# Supplementary material for: Extracellular Delivery of Functional Mitochondria Rescues the Dysfunction of CD4+ T Cells in Aging
Source: PubMed Central journal article supplement (PMC10837346; doi:10.1002/advs.202303664), 2023-11-21
Supplement: ADVS-11-2303664-s001.pdf [file ADVS-11-2303664-s001.pdf]

## Supporting Information

for *Adv. Sci.*, DOI 10.1002/advs.202303664

Extracellular Delivery of Functional Mitochondria Rescues the Dysfunction of CD4<sup>+</sup> T Cells in Aging

*Colwyn A. Headley, Shalini Gautam, Angelica Olmo-Fontanez, Andreu Garcia-Vilanova, Varun Dwivedi, Anwari Akhter, Alyssa Schami, Kevin Chiem, Russell Ault, Hao Zhang, Hong Cai, Alison Whigham, Jennifer Delgado, Amberlee Hicks, Philip S. Tsao, Jonathan Gelfond, Luis Martinez-Sobrido, Yufeng Wang, Jordi B. Torrelles\* and Joanne Turner\**

**Supplementary figures.**

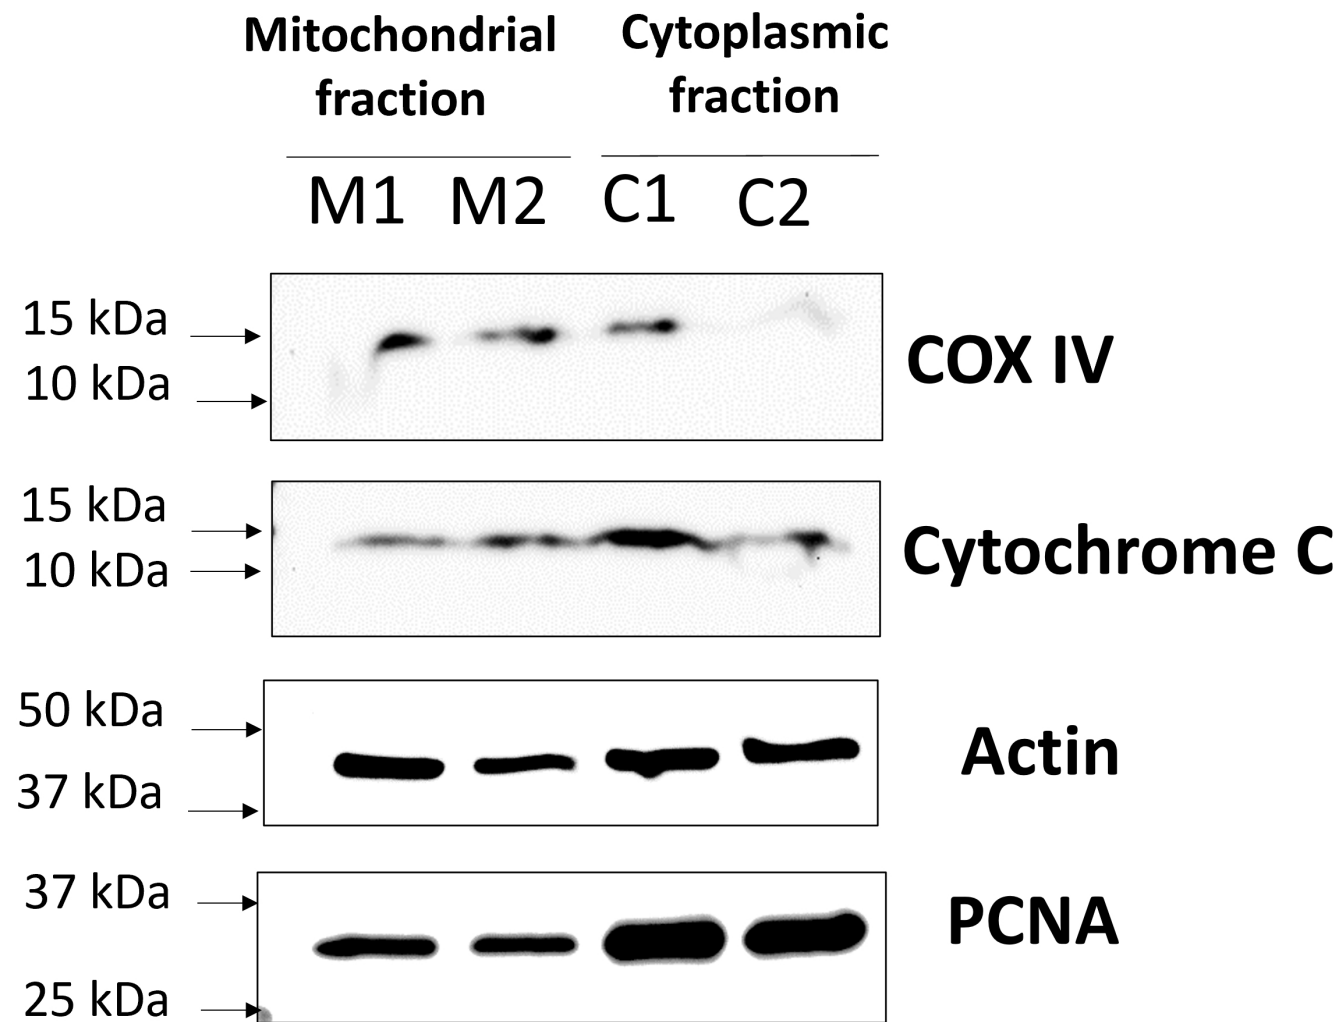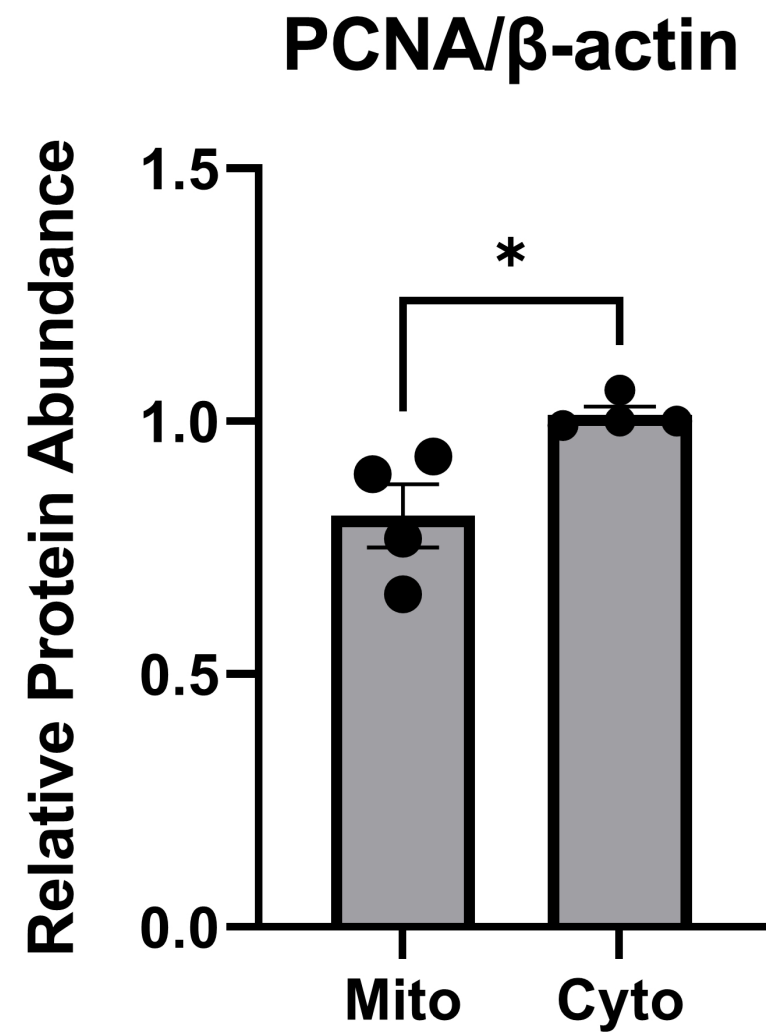

**Supp. Fig. 1. Purity of mitochondrial isolation. A)** Representative western blot images of probed mitochondrial and nuclear proteins in the mitochondrial fraction and cell fragments/unlysed cells after mitochondrial isolation. **B)** Relative amount of PCNA normalized to B-actin. Western Blot images were analyzed using high contrast settings. (n=4),  $p < 0.05$  = significant (\*) using unpaired Student's t-test.

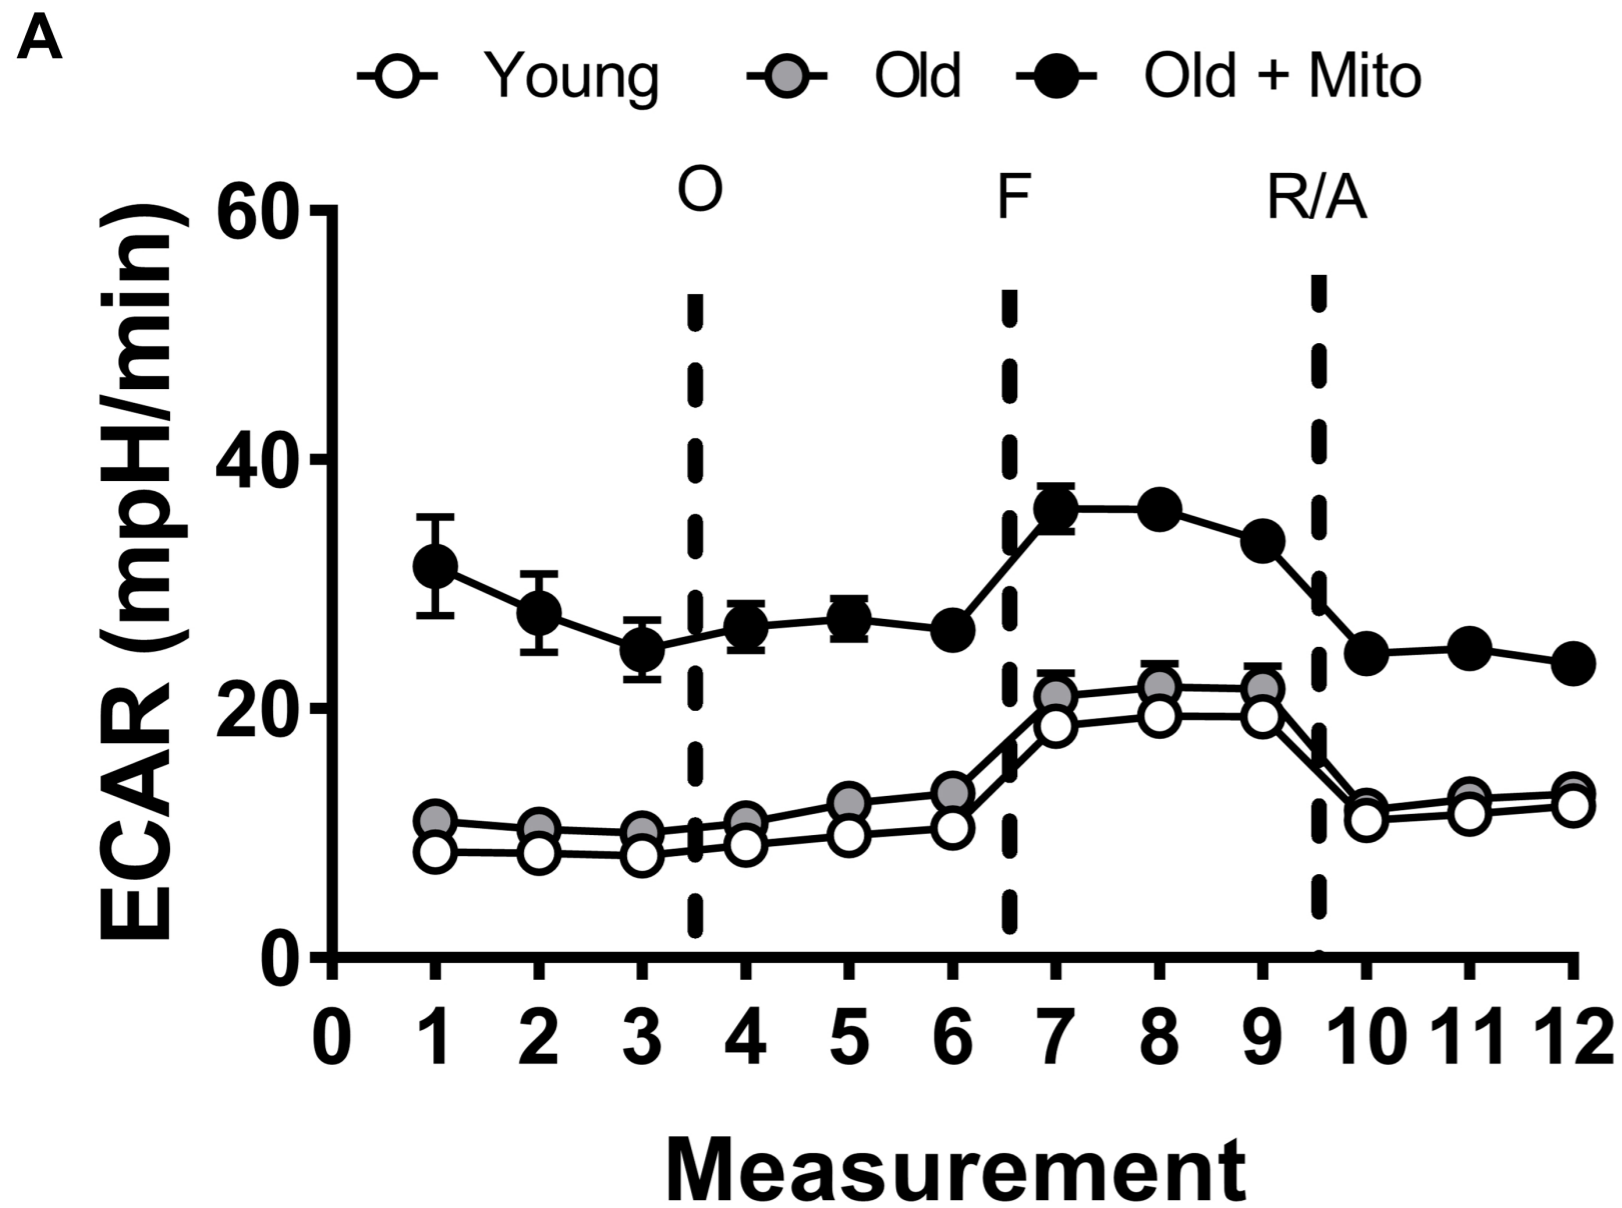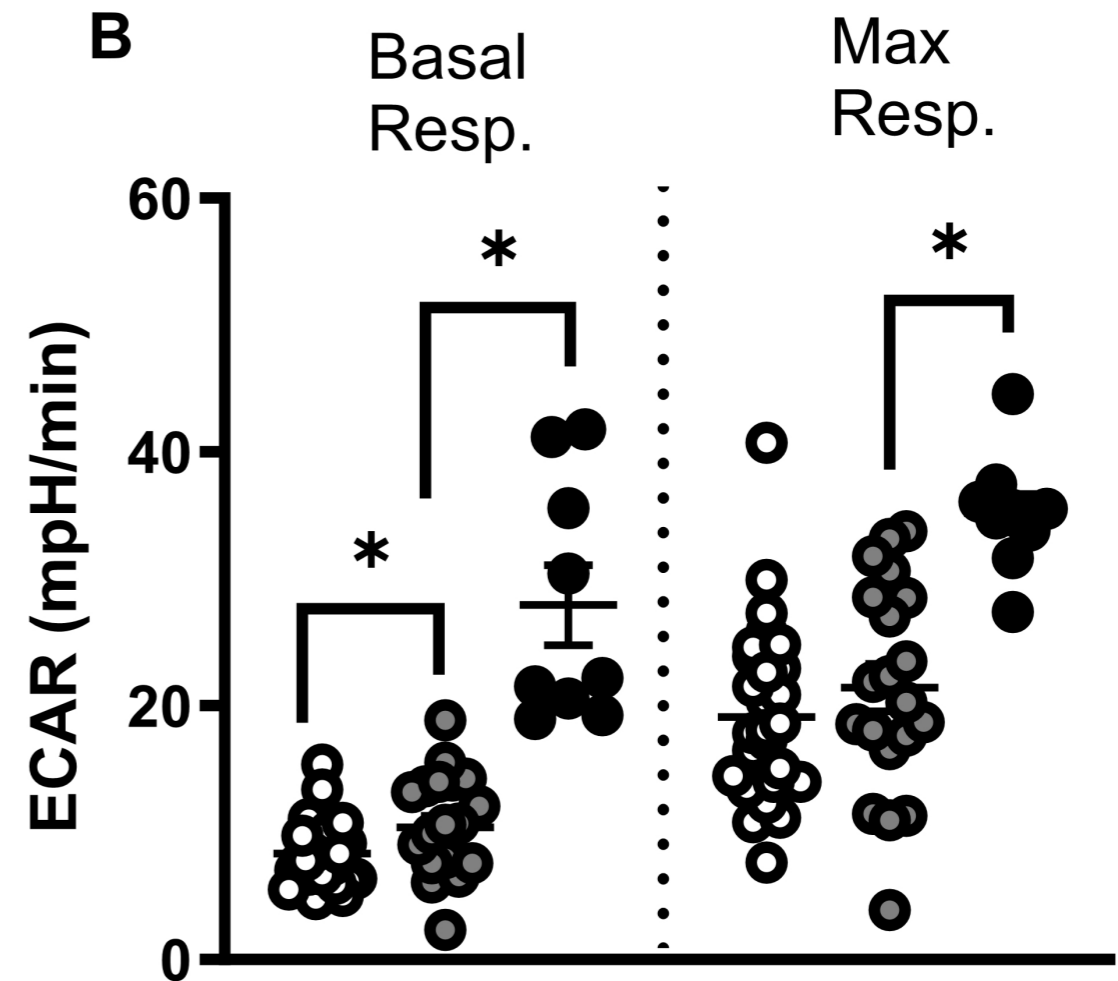

**Supp. Fig. 2. Mito-transfer increases ECAR of CD4<sup>+</sup> T cells from old mice. A)** Kinetic curve of ECAR collected from mito-stress test assay, **B)** ECAR corresponding to basal and maximal respiration of CD4<sup>+</sup> T cells. 3-4 mice were used per group and experiments were replicated twice (n=3), p<0.05=significant (\*) using unpaired Student's t-test.

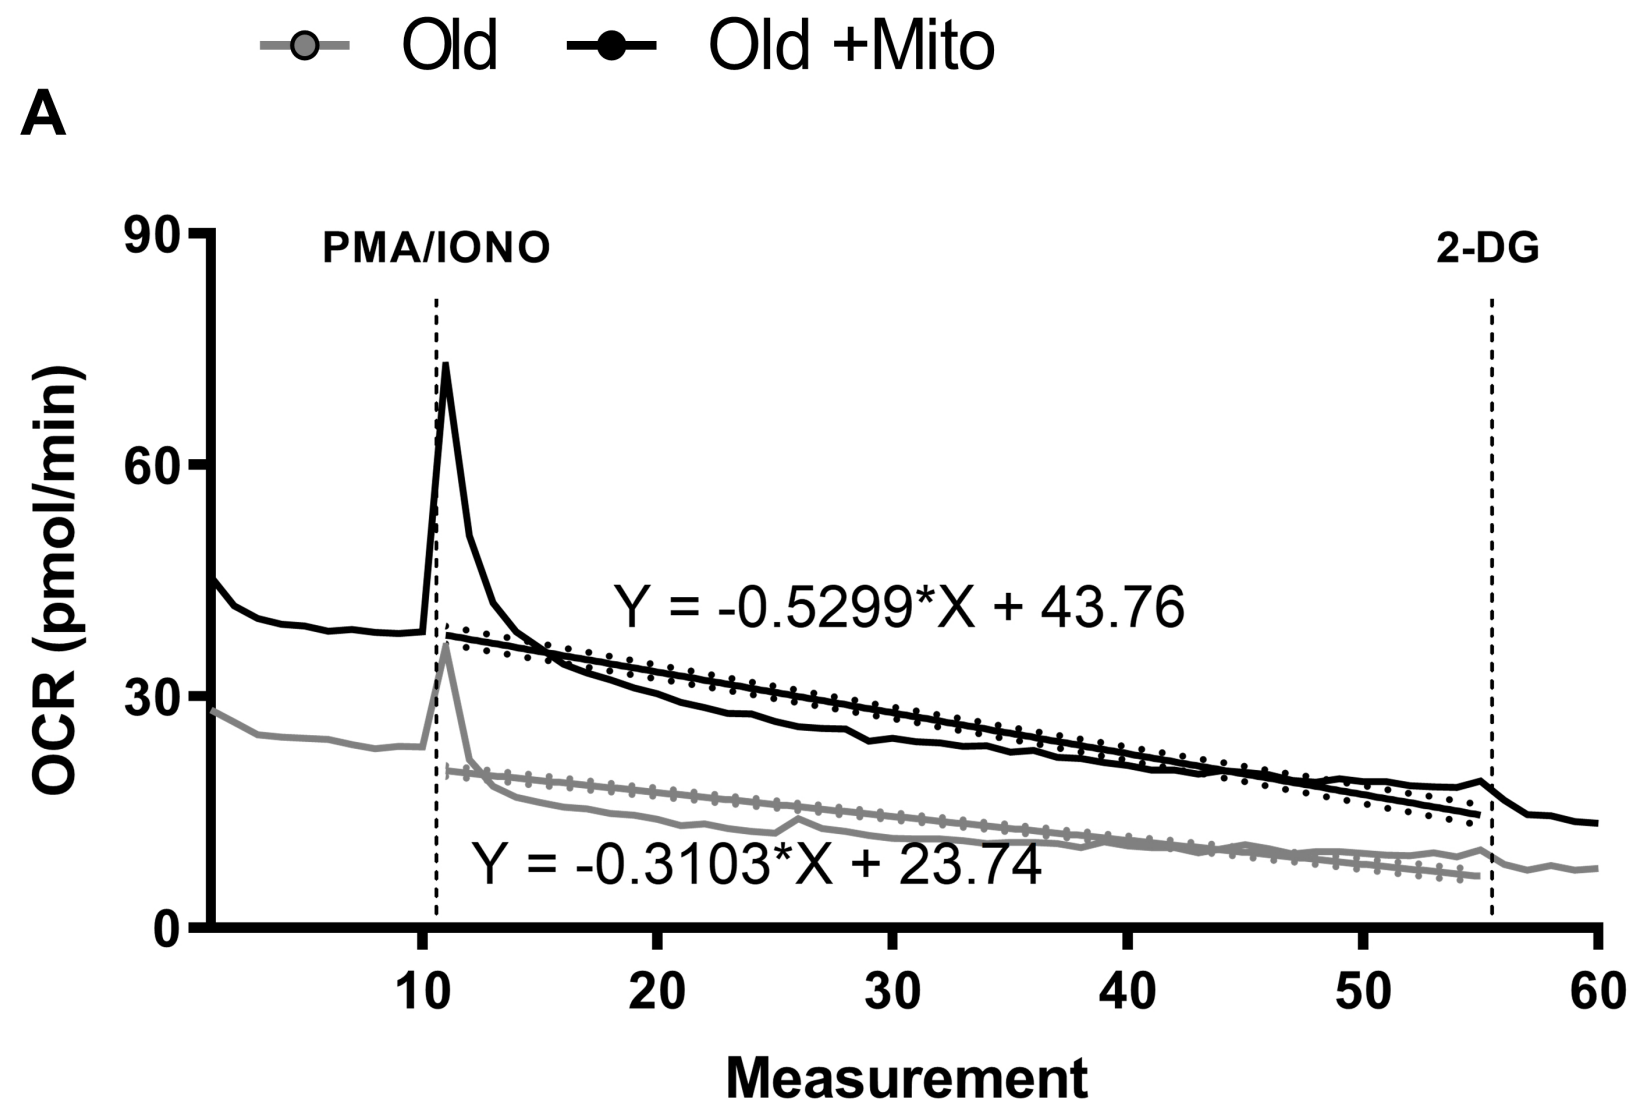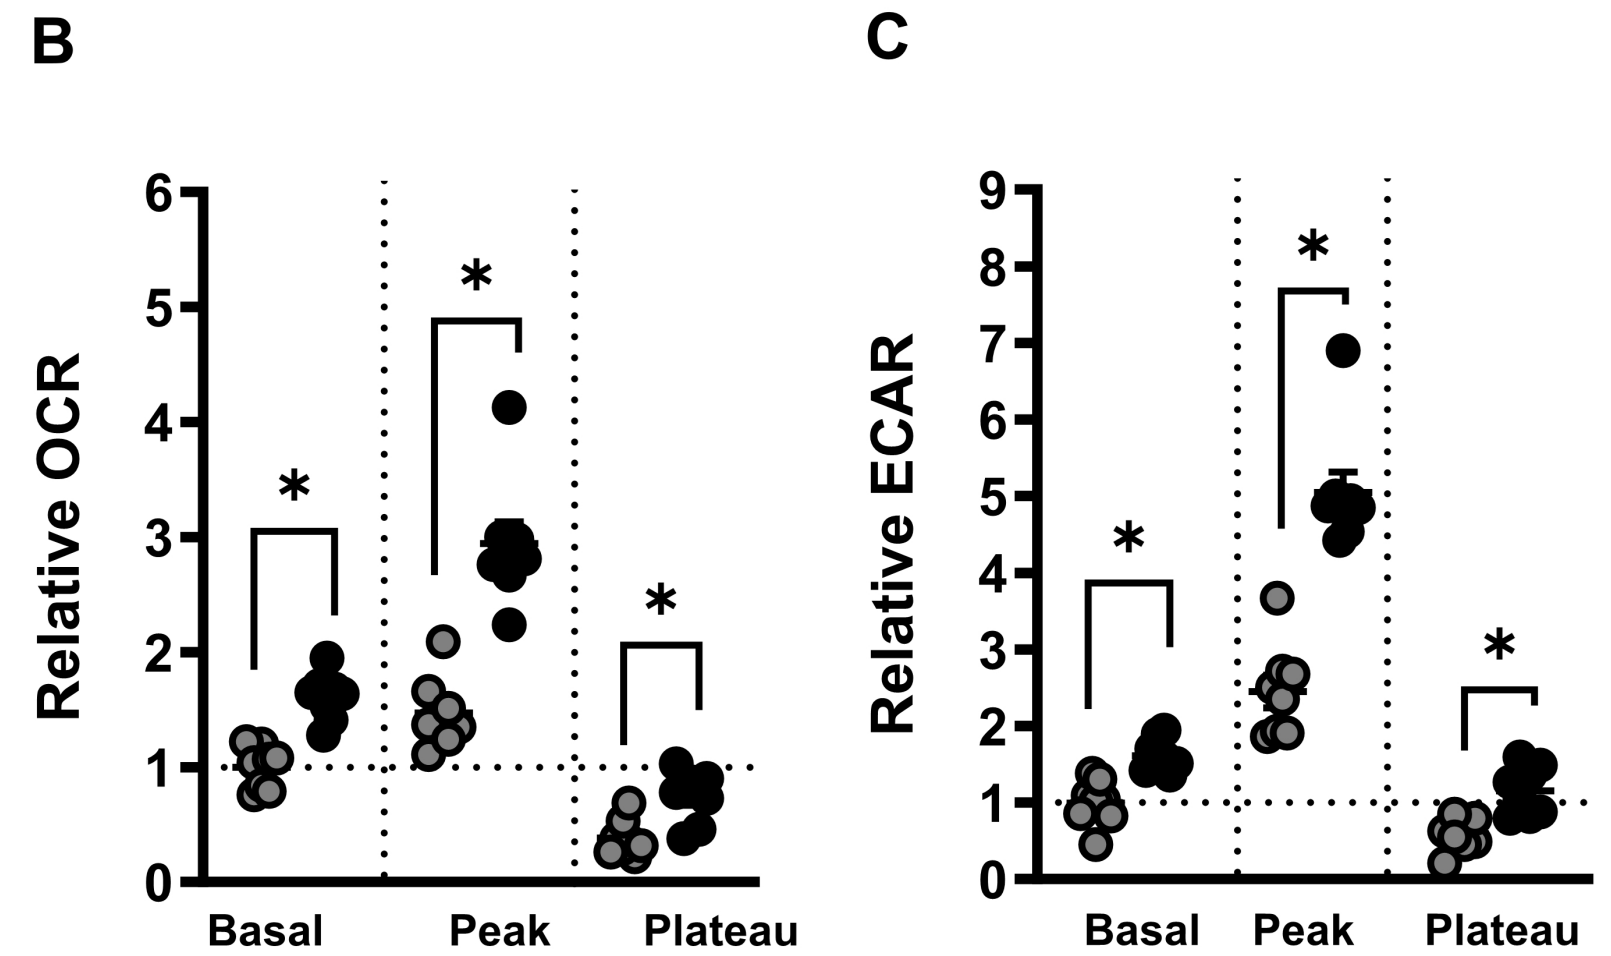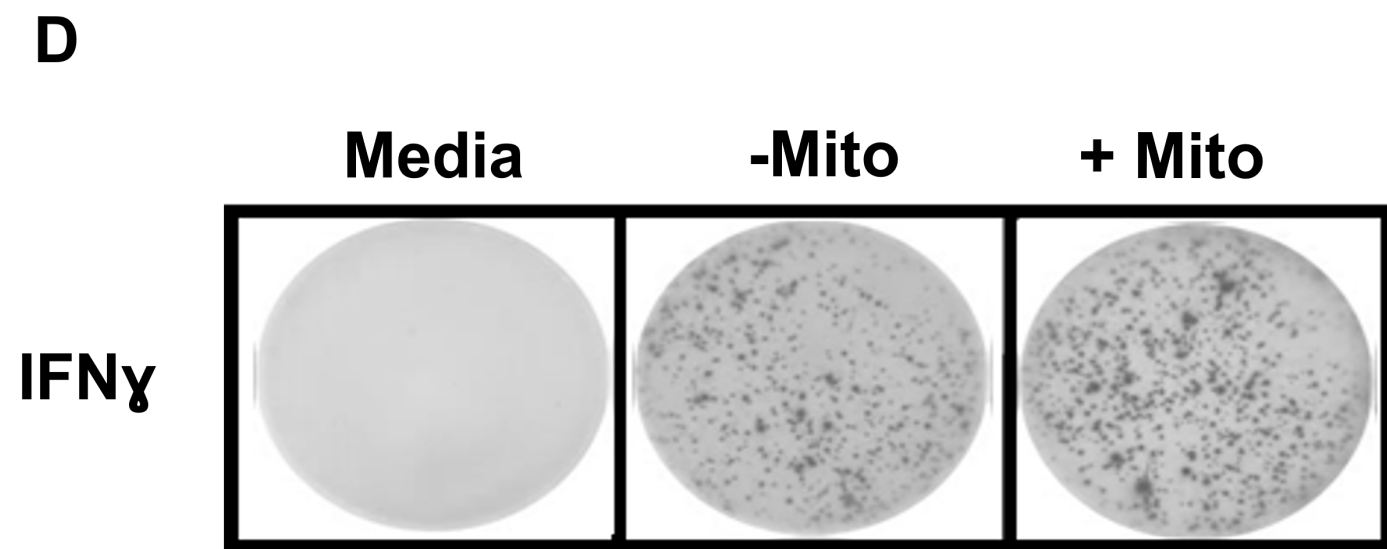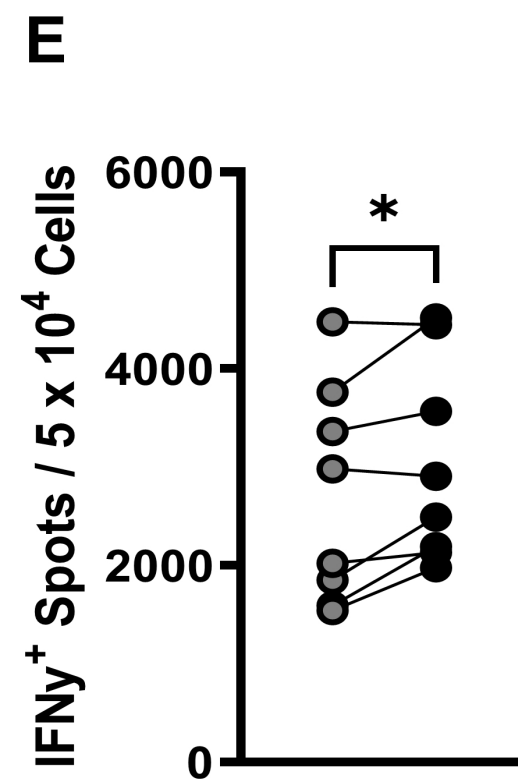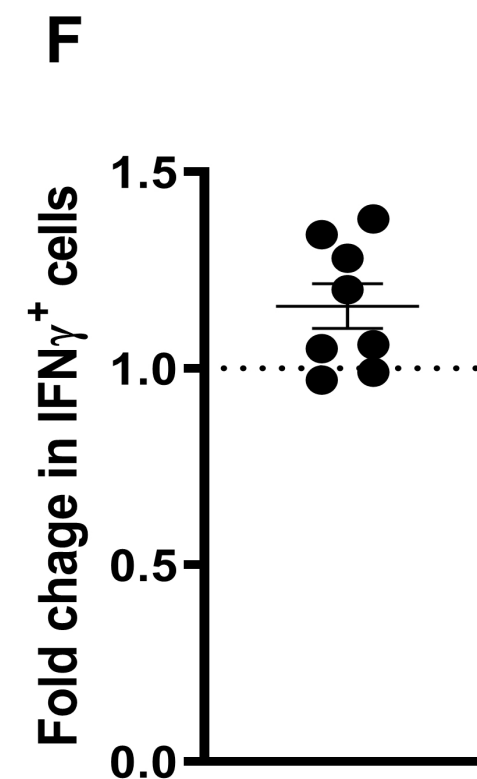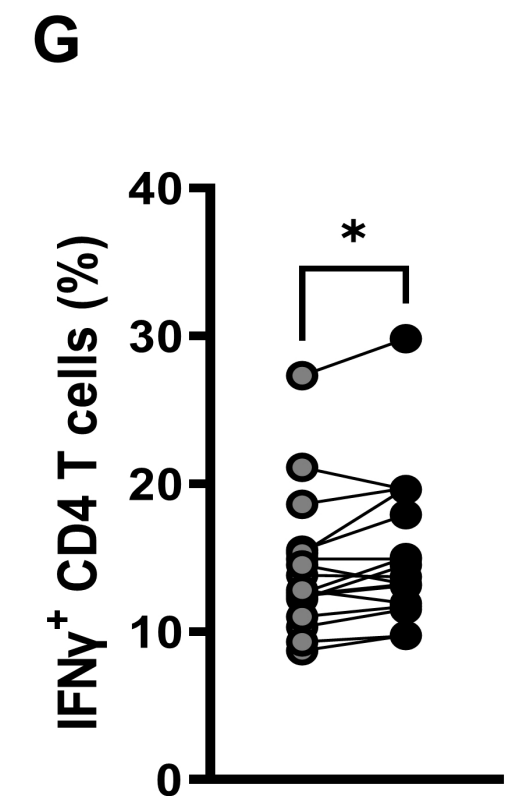

**Supp. Fig. 3. Mito-transfer enhanced T cell activation induced metabolic switch and increased IFN $\gamma$ <sup>+</sup> CD4<sup>+</sup> T cells.** **A)** The slope of OCR depression after acute injection of PMA/IONO in mito-transferred and non-manipulated CD4<sup>+</sup> T cells from old mice. The relative change in **B)** OCR and **C)** ECAR of activated T cells (non-normalized to group). **D-G)** CD4<sup>+</sup> T cells from old mice with or without mito-transfer were stimulated with PMA/Ionomycin, after which various assays were used to quantify IFN $\gamma$  production. **D)** Representative EliSpot images, **E)** the number IFN $\gamma$ <sup>+</sup> producing T cells, and **F)** the fold change in IFN $\gamma$ <sup>+</sup> producing CD4<sup>+</sup> T cells from old mice with or without mito-transfer, after stimulation with PMA/Ionomycin (24hr). The **G)** percent of IFN $\gamma$ <sup>+</sup> CD4<sup>+</sup> T cells via intracellular cytokine staining, in CD4<sup>+</sup> T cells from old mice with or without mito-transfer, after stimulation with PMA/Ionomycin (4h). 3-4 mice per group, repeated at least once (n  $\geq$  2). p < 0.05 = significant (\*) using paired Student's *t*-test.



○ Old   ● Old + Mito

**A**

**IL-2**

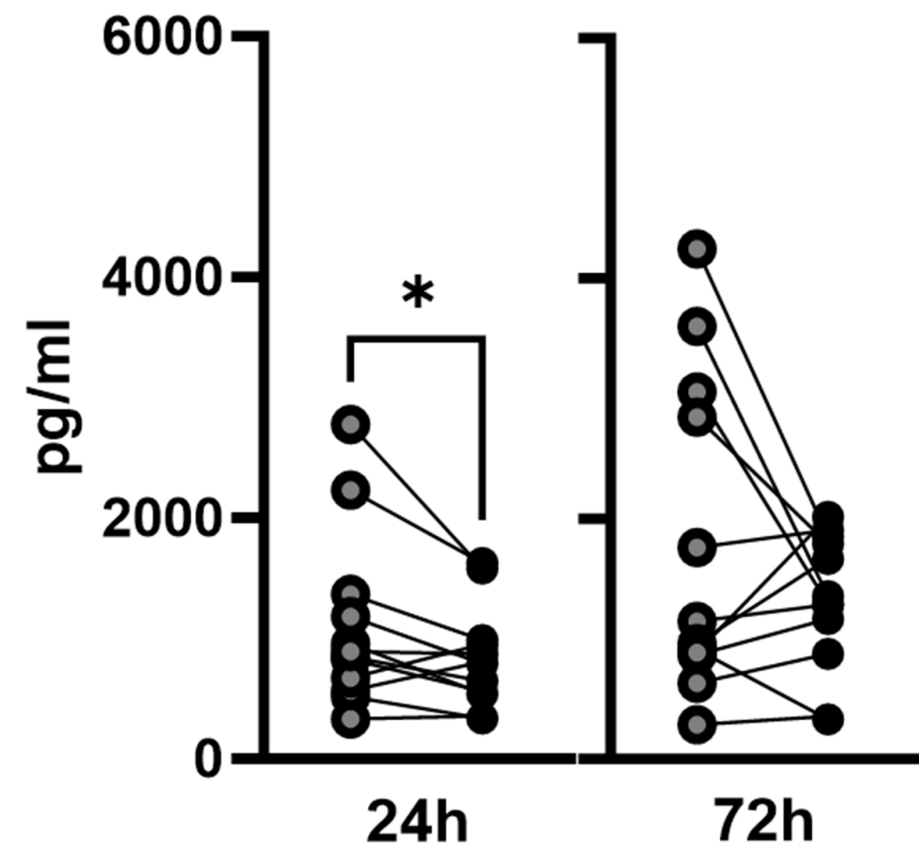

**B**

**IL-4**

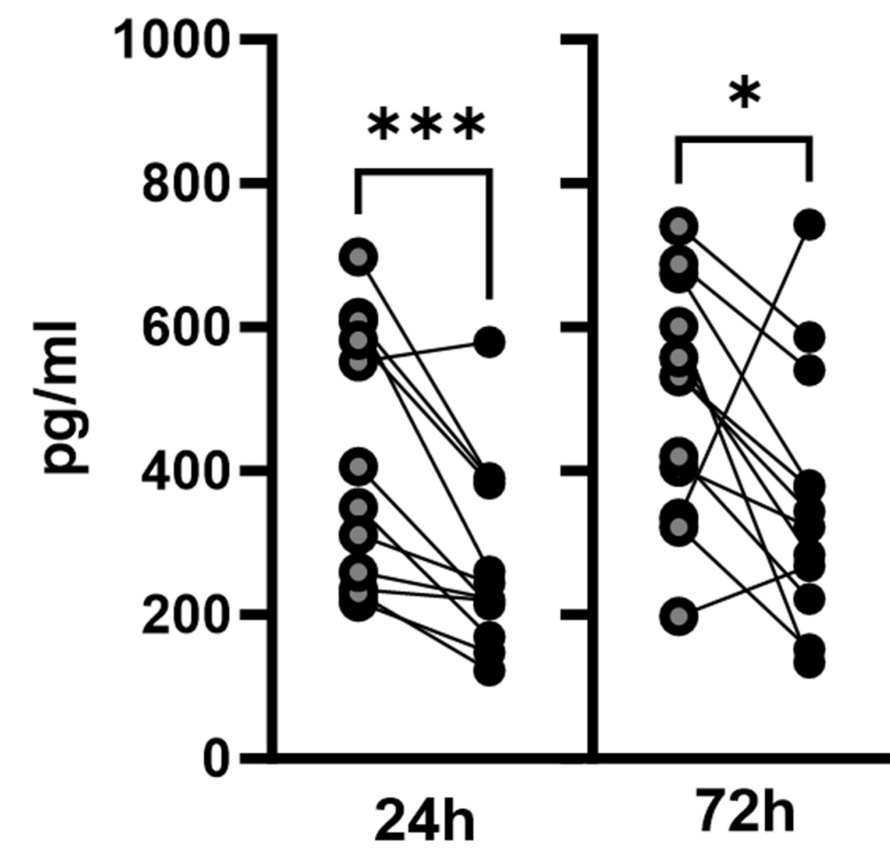

**C**

**IL-5**

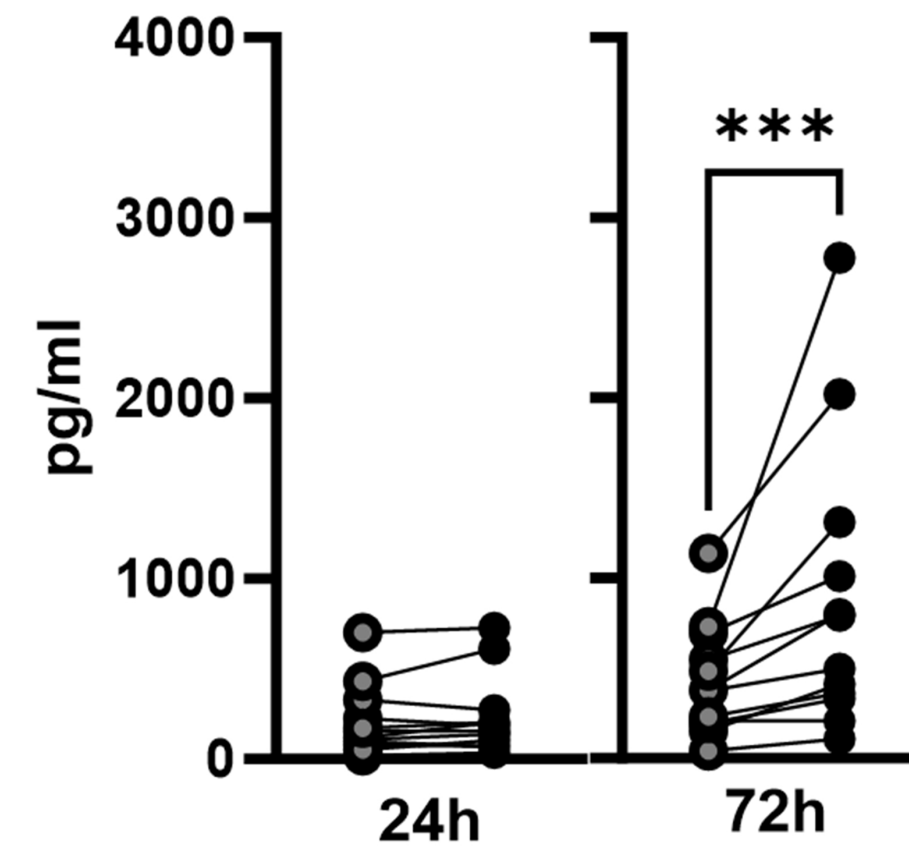

**D**

**IL-10**

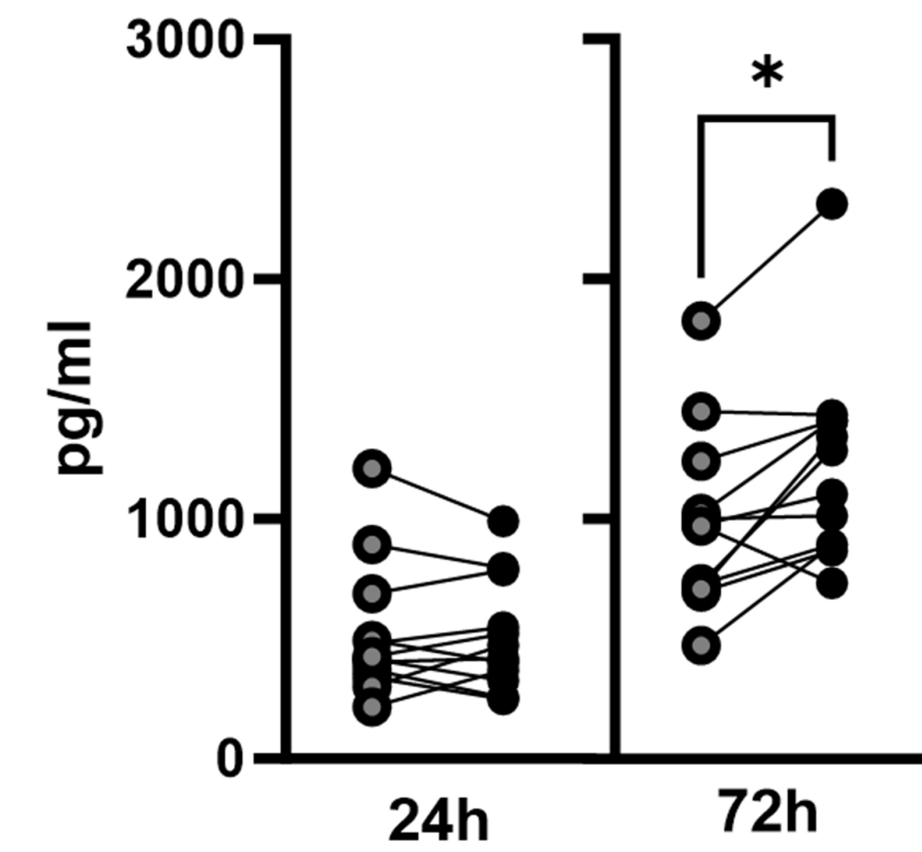

**E**

**IL-17a**

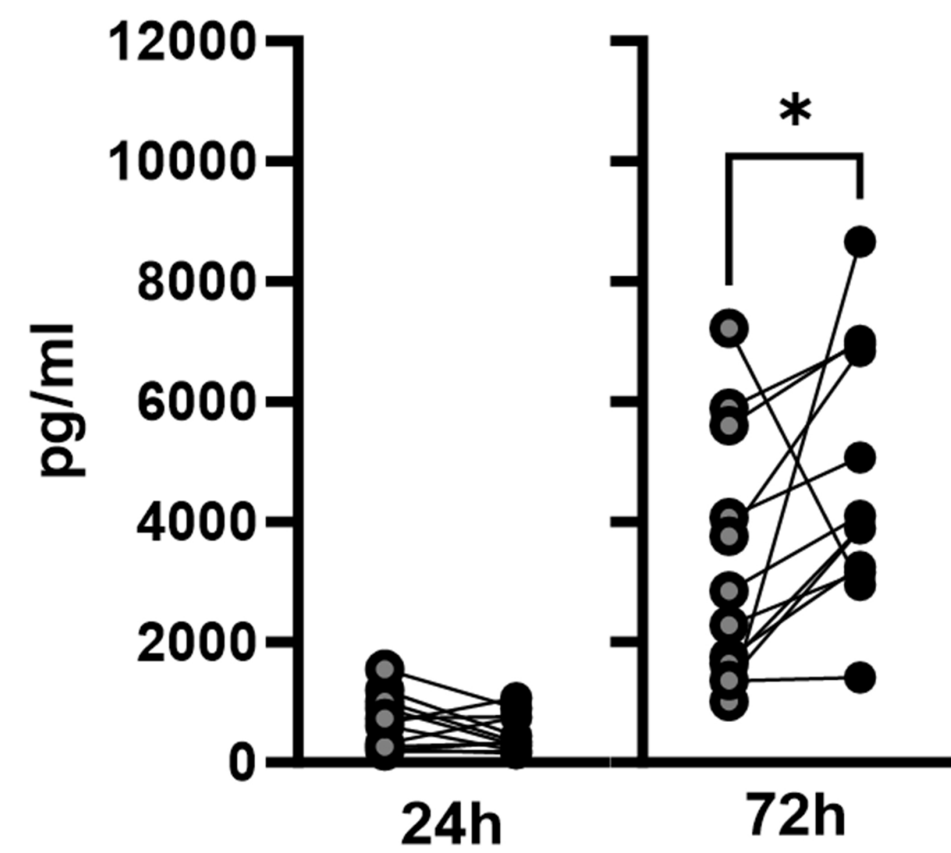

**F**

**IFN $\gamma$**

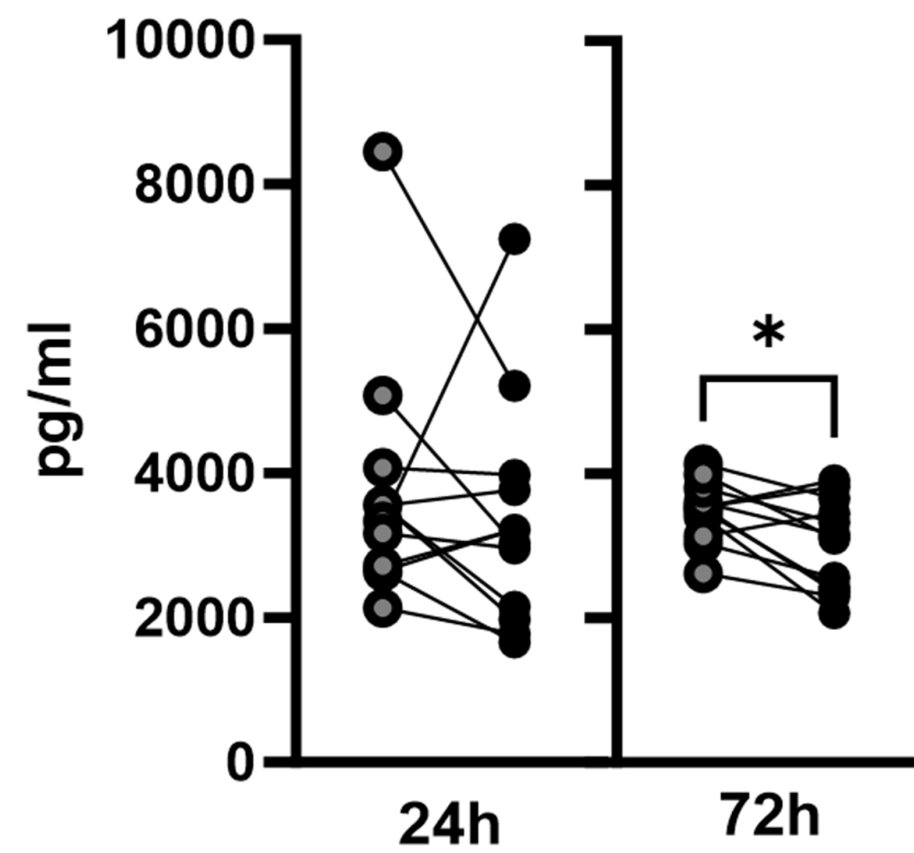

**H**

**TNF $\alpha$**

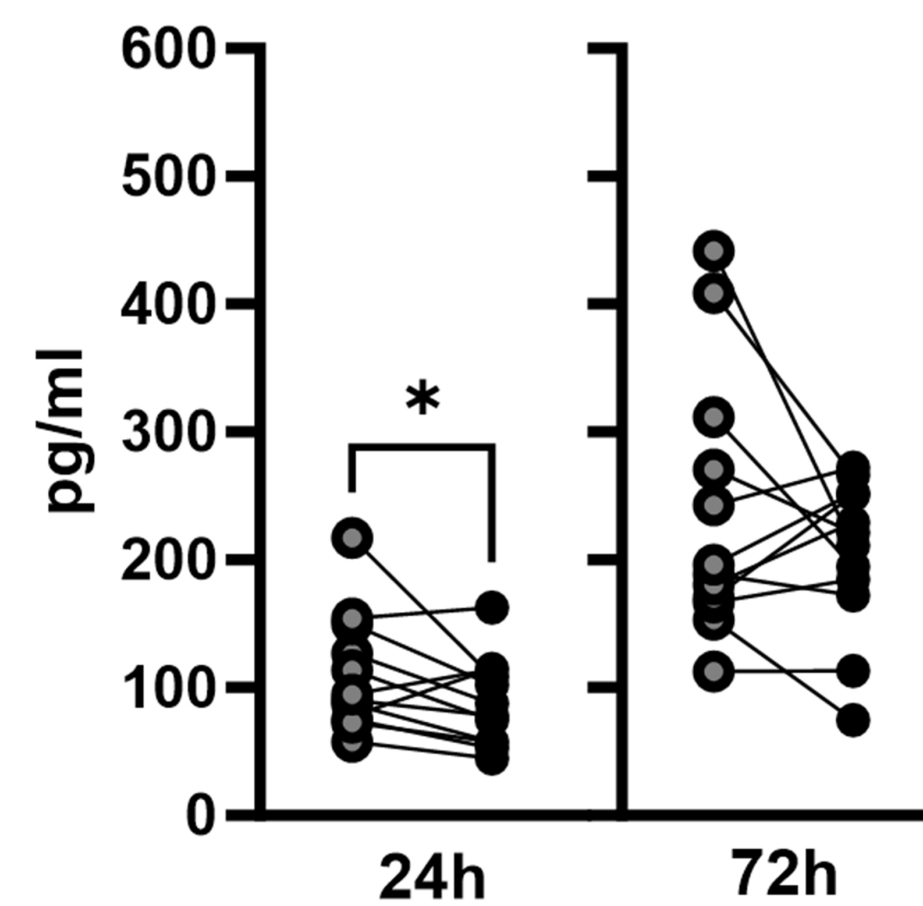

**I**

**CCL5/RANTES**

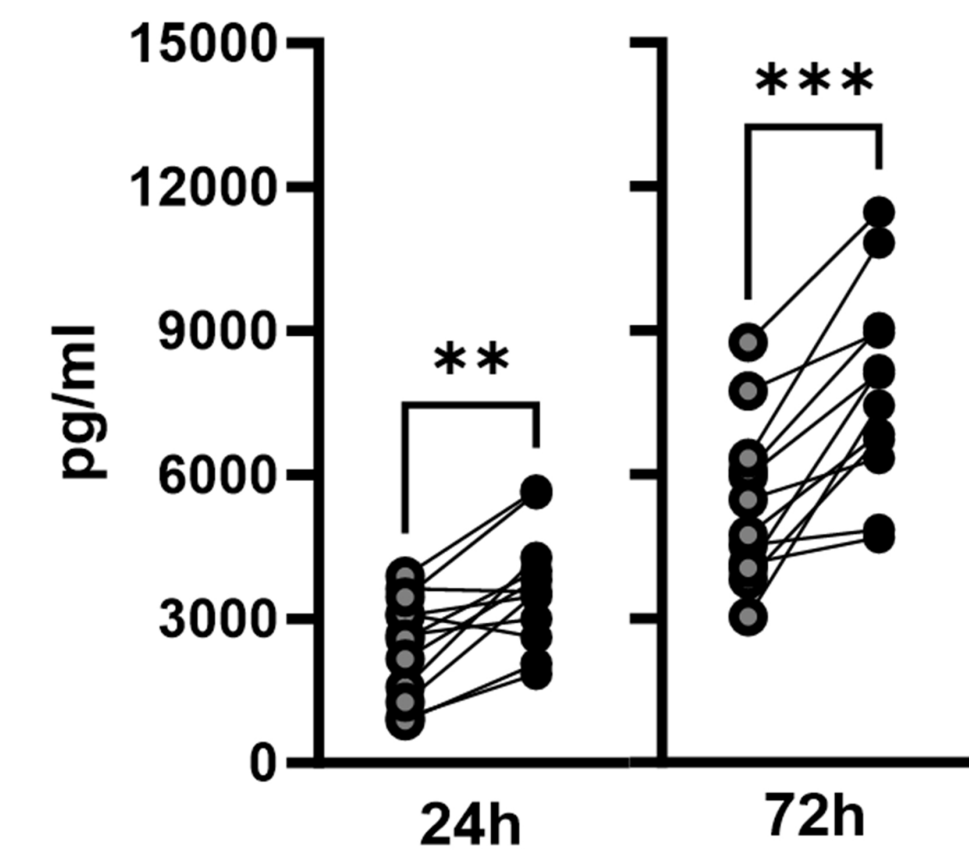

**Supp. Fig. 4. Mito-transfer alters T cell activation & cytokine production of CD4<sup>+</sup> T cells in old mice.** CD4<sup>+</sup> T cells from old mice with or without mito-transfer were stimulated with PMA/Ionomycin. After 24 and 72 h of stimulation with PMA/Ionomycin, the supernatants were examined by Luminex array for cytokines produced.  $p \leq 0.05 = *$ ,  $p \leq 0.01 = **$ , or  $p \leq 0.001 = ***$  using paired Student's *t*-test.

- No Naive CD4<sup>+</sup> T Cells
- Old Naive CD4<sup>+</sup> T Cells
- Old Naive CD4<sup>+</sup> T Cells + Mito-transfer

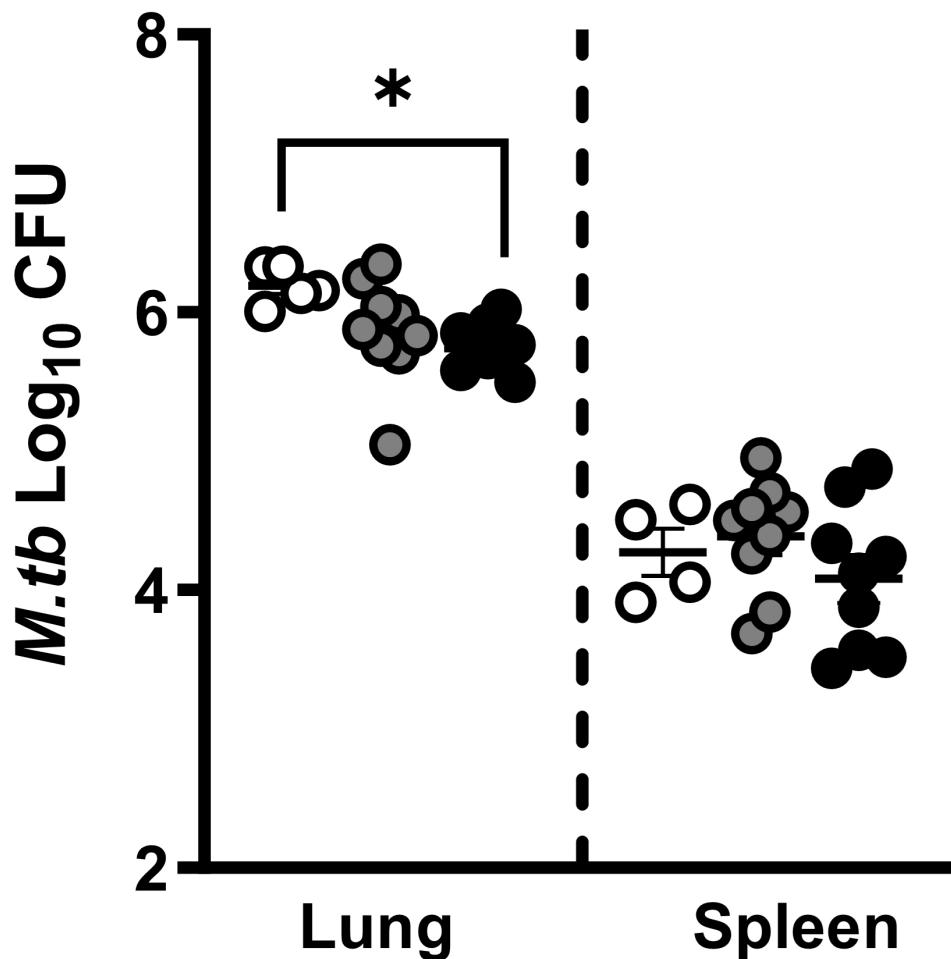

**Supp. Fig. 5. Mito-transfer in naïve CD4 T cells from old mice protected mice against pathogens.** Naïve CD4<sup>+</sup> T cells from old mice with or without mito-transfer, or PBS were tail vein injected in Rag1-KO mice that were subsequently infected with *M.tb*. Lung and spleen CFU burden after 21 days of *M.tb* infection in Rag1-KO mice adoptively treated with 1x 10<sup>6</sup> naïve CD4<sup>+</sup> T cells from old mice with or without mito-transfer. 4-8 mice per group, with  $p \leq 0.05 = *$ , using unpaired Student's *t*-test.

| Uniprot ID | Gene ID | P.Val | FDR   | O1     | O2     | O3     | OM1    | OM2    | OM3    |
|------------|---------|-------|-------|--------|--------|--------|--------|--------|--------|
| P24270     | Cat     | 0.046 | 0.148 | 0.177  | 0.000  | -0.253 | 1.040  | 0.403  | 0.494  |
| Q99LX0     | Park7   | 0.001 | 0.015 | 0.016  | -0.257 | 0.000  | -1.140 | -1.450 | -1.350 |
| P11247     | Mpo     | 0.459 | 0.719 | 1.480  | 0.000  | -0.328 | 0.674  | -0.715 | -0.546 |
| Q9JMH6     | Txnrd1  | 0.030 | 0.114 | 0.000  | -0.115 | 0.093  | -0.408 | -1.270 | -1.320 |
| P08228     | Sod1    | 0.000 | 0.013 | -0.224 | 0.010  | 0.000  | -1.080 | -1.290 | -1.170 |
| Q9ERR7     | Sep15   | 0.054 | 0.164 | 0.000  | 0.000  | 0.112  | 0.582  | 0.658  | 0.160  |
| O08709     | Prdx6   | 0.003 | 0.031 | 0.085  | 0.000  | -0.156 | -1.090 | -1.810 | -1.670 |
| P19157     | Gstp1   | 0.004 | 0.036 | -0.138 | 0.000  | 0.106  | -1.050 | -1.380 | -0.809 |
| Q8CDN6     | Txn1    | 0.008 | 0.051 | 0.000  | 0.040  | -0.283 | -0.969 | -1.380 | -0.821 |
| P11352     | Gpx1    | 0.131 | 0.294 | 0.457  | 0.000  | -0.235 | -0.028 | -0.804 | -0.877 |
| P99029     | Prdx5   | 0.996 | 1.000 | 0.234  | 0.000  | -0.266 | 0.051  | -0.201 | 0.121  |
| Q61171     | Prdx2   | 0.040 | 0.134 | 0.089  | 0.000  | -0.208 | -0.353 | -0.755 | -0.402 |
| P09671     | Sod2    | 0.023 | 0.096 | -0.061 | 0.348  | 0.000  | 0.715  | 0.476  | 0.682  |
| P02088     | Hbb-b1  | 0.050 | 0.155 | 0.499  | 0.000  | -0.660 | -1.080 | -1.670 | -3.060 |
| P35700     | Prdx1   | 0.130 | 0.293 | 0.028  | 0.000  | -0.030 | 0.421  | -0.006 | 0.325  |
| Q99LJ6     | Gpx7    | 0.000 | 0.012 | 0.150  | -1.130 | 0.000  | 5.360  | 4.910  | 5.340  |
| Q9D7B7     | Gpx8    | 0.000 | 0.007 | 0.000  | 0.540  | -0.171 | 5.920  | 5.450  | 5.940  |
| P31725     | S100a9  | 0.374 | 0.622 | 1.930  | 0.000  | -0.136 | 0.985  | -2.240 | -0.397 |
| P01942     | Hba     | 0.040 | 0.135 | 0.473  | 0.000  | -0.794 | -0.999 | -1.950 | -2.470 |
| P49290     | Epx     | 0.465 | 0.724 | 1.320  | -0.368 | 0.000  | 0.885  | -1.770 | -0.395 |
| P22437     | Ptgs1   | 0.902 | 1.000 | 0.376  | 0.000  | -0.608 | 0.313  | -0.174 | -0.239 |
| P62342     | Selt    | 0.115 | 0.270 | 0.000  | 0.100  | -0.390 | 0.284  | 0.120  | 0.255  |
| Q91VS7     | Mgst1   | 0.030 | 0.113 | 0.999  | 0.000  | -0.245 | 1.580  | 1.500  | 2.410  |
| P47791     | Gsr     | 0.018 | 0.084 | 0.341  | 0.000  | -0.118 | -0.466 | -1.080 | -1.080 |
| Q9JLT4     | Txnrd2  | 0.839 | 1.000 | 0.000  | 0.351  | -0.041 | 0.125  | 0.030  | 0.247  |
| Q6ZPY7     | Kdm3b   | 0.027 | 0.107 | 0.000  | 0.495  | -0.124 | -0.530 | -1.600 | -1.240 |
| Q9CQM5     | Txnrd17 | 0.008 | 0.055 | -0.143 | 0.362  | 0.000  | -1.500 | -1.760 | -2.830 |
| P08226     | ApoE    | 0.508 | 0.772 | 0.861  | -0.299 | 0.000  | 0.960  | 0.161  | 0.360  |
| P20108     | Prdx3   | 0.006 | 0.046 | 0.214  | -0.058 | 0.000  | 0.778  | 0.509  | 0.675  |
| Q61646     | Hp      | 0.202 | 0.399 | 1.520  | -0.351 | 0.000  | 0.109  | -1.160 | -0.961 |
| O08807     | Prdx4   | 0.256 | 0.470 | 0.038  | 0.000  | -0.002 | 0.439  | -0.070 | 0.262  |
| Q9DCM2     | Gstk1   | 0.701 | 0.977 | 0.010  | 0.000  | -0.212 | 0.377  | -0.571 | -0.378 |
| Q9BCZ4     | Vimp    | 0.732 | 1.000 | -0.386 | 0.179  | 0.000  | 0.206  | -0.445 | -0.249 |
| Q9WU84     | Ccs     | 0.004 | 0.036 | -0.087 | 0.000  | 0.263  | -0.735 | -1.230 | -1.050 |
| P30355     | Alox5ap | 0.424 | 0.678 | 0.786  | 0.000  | -0.301 | 1.160  | 0.291  | 0.218  |
| P02104     | Hbb-y   | 0.451 | 0.708 | 0.641  | 0.000  | -2.510 | -0.842 | -1.560 | -2.020 |
| P97346     | Nxn     | 0.333 | 0.570 | 0.333  | 0.000  | -1.090 | -2.170 | 0.304  | -1.790 |

| Uniprot | Gene ID | P.Val | FDR   | O1    | O2    | O3     | OM1   | OM2    | OM3    |
|---------|---------|-------|-------|-------|-------|--------|-------|--------|--------|
| P24270  | Cat     | 0.046 | 0.148 | 0.177 | 0.000 | -0.253 | 1.040 | 0.403  | 0.494  |
| P47738  | Aldh2   | 0.815 | 1.000 | 0.398 | 0.000 | -0.923 | 0.773 | -0.269 | -0.602 |

|        |         |       |       |        |        |        |        |        |        |
|--------|---------|-------|-------|--------|--------|--------|--------|--------|--------|
| Q8VDK1 | Nit1    | 0.269 | 0.488 | 0.029  | 0.000  | -0.100 | -0.074 | -0.053 | -0.391 |
| P47740 | Aldh3a2 | 0.057 | 0.169 | 0.000  | 0.097  | -0.121 | 0.310  | 0.102  | 0.328  |
| Q9JMH6 | Txnrd1  | 0.030 | 0.114 | 0.000  | -0.115 | 0.093  | -0.408 | -1.270 | -1.320 |
| P08228 | Sod1    | 0.000 | 0.013 | -0.224 | 0.010  | 0.000  | -1.080 | -1.290 | -1.170 |
| Q99J99 | Mpst    | 0.334 | 0.571 | 0.163  | 0.000  | -0.160 | 0.378  | -0.932 | -0.891 |
| Q9JHW2 | Nit2    | 0.309 | 0.542 | -0.141 | 0.431  | 0.000  | 0.296  | 0.245  | 0.362  |
| O08709 | Prdx6   | 0.003 | 0.031 | 0.085  | 0.000  | -0.156 | -1.090 | -1.810 | -1.670 |
| P11352 | Gpx1    | 0.131 | 0.294 | 0.457  | 0.000  | -0.235 | -0.028 | -0.804 | -0.877 |
| P99029 | Prdx5   | 0.996 | 1.000 | 0.234  | 0.000  | -0.266 | 0.051  | -0.201 | 0.121  |
| Q61171 | Prdx2   | 0.040 | 0.134 | 0.089  | 0.000  | -0.208 | -0.353 | -0.755 | -0.402 |
| P09671 | Sod2    | 0.023 | 0.096 | -0.061 | 0.348  | 0.000  | 0.715  | 0.476  | 0.682  |
| Q64133 | Maoa    | 0.000 | 0.011 | 0.151  | 0.000  | -0.761 | 3.640  | 3.580  | 3.770  |
| Q8R164 | Bphl    | 0.031 | 0.114 | 0.197  | 0.000  | -0.133 | 0.714  | 0.305  | 0.778  |
| Q9DBF1 | Aldh7a1 | 0.000 | 0.009 | 0.000  | 0.318  | -0.191 | 2.700  | 2.460  | 2.520  |
| Q9WVLO | Gstz1   | 0.112 | 0.265 | 0.000  | 0.163  | -0.024 | 1.190  | 0.487  | 0.239  |
| Q9DCN2 | Cyb5r3  | 0.000 | 0.005 | 0.000  | 0.161  | -0.051 | 2.080  | 1.950  | 2.120  |
| Q8BW75 | Maob    | 0.000 | 0.013 | 0.667  | 0.000  | -0.370 | 4.120  | 3.720  | 4.010  |
| Q9CQX2 | Cyb5b   | 0.013 | 0.071 | -0.164 | 0.064  | 0.000  | 0.975  | 0.423  | 0.947  |
| Q99KB8 | Hagh    | 0.754 | 1.000 | 0.142  | 0.000  | -0.442 | -0.018 | -0.512 | -0.014 |
| Q9JLJ2 | Aldh9a1 | 0.081 | 0.213 | 0.030  | -0.088 | 0.000  | -0.239 | -1.410 | -0.779 |
| Q91VS7 | Mgst1   | 0.030 | 0.113 | 0.999  | 0.000  | -0.245 | 1.580  | 1.500  | 2.410  |
| P47791 | Gsr     | 0.018 | 0.084 | 0.341  | 0.000  | -0.118 | -0.466 | -1.080 | -1.080 |
| Q9JLT4 | Txnrd2  | 0.839 | 1.000 | 0.000  | 0.351  | -0.041 | 0.125  | 0.030  | 0.247  |
| P20108 | Prdx3   | 0.006 | 0.046 | 0.214  | -0.058 | 0.000  | 0.778  | 0.509  | 0.675  |
| O08807 | Prdx4   | 0.256 | 0.470 | 0.038  | 0.000  | -0.002 | 0.439  | -0.070 | 0.262  |
| Q9D6Y7 | Msra    | 0.068 | 0.189 | 0.549  | -0.217 | 0.000  | -0.252 | -0.768 | -0.814 |
| Q9DCM2 | Gstk1   | 0.701 | 0.977 | 0.010  | 0.000  | -0.212 | 0.377  | -0.571 | -0.378 |

**Supp. Table 1.** Antioxidant & mitochondrial detoxification proteins were detected in CD4<sup>+</sup> T cells isolated from old mice after mito-transfer and in non-manipulated CD4<sup>+</sup> T cells from old mice. CD4<sup>+</sup> T cells from young and old mice, and from old mice after mito-transfer were cultured for 4 h before processing for mass spectrometry analysis. Data expressed as median protein Log2 fold change of CD4<sup>+</sup> T cells from old mice, from 3 individual old mice (paired experiment)

| Uniprot ID | Gene ID | P. Val | FDR   | O1    | O2    | O3     | OM1   | OM2   | OM3   |
|------------|---------|--------|-------|-------|-------|--------|-------|-------|-------|
| Q9JIK9     | Mrps34  | 0.049  | 0.154 | 0.000 | 0.757 | -0.497 | 1.210 | 1.140 | 1.010 |
| Q8K1Z0     | Coq9    | 0.032  | 0.117 | 0.000 | 0.186 | -0.023 | 0.862 | 0.388 | 0.472 |
| P97450     | Atp5j   | 0.033  | 0.121 | 0.000 | 0.125 | -0.630 | 1.010 | 0.420 | 1.140 |

|        |          |       |       |        |        |        |        |        |        |
|--------|----------|-------|-------|--------|--------|--------|--------|--------|--------|
| Q9D0K2 | Oxct1    | 0.000 | 0.012 | 0.000  | 0.092  | -0.243 | 1.760  | 1.440  | 1.670  |
| P52825 | Cpt2     | 0.312 | 0.545 | 0.000  | 0.208  | -0.370 | 1.210  | 0.043  | 0.051  |
| Q9D6J6 | Ndufv2   | 0.049 | 0.154 | 0.000  | 0.342  | -0.183 | 0.718  | 0.363  | 0.856  |
| O08734 | Bak1     | 0.010 | 0.060 | 0.000  | 0.028  | -0.547 | 0.687  | 0.764  | 0.655  |
| P24270 | Cat      | 0.046 | 0.148 | 0.177  | 0.000  | -0.253 | 1.040  | 0.403  | 0.494  |
| Q8BJZ4 | Mrps35   | 0.007 | 0.051 | 0.062  | 0.000  | -0.636 | 1.340  | 1.050  | 0.901  |
| D3Z7P3 | Gls      | 0.500 | 0.765 | 0.000  | 0.006  | -0.037 | 0.732  | -0.191 | 0.043  |
| Q9JI39 | Abcb10   | 0.138 | 0.303 | 0.860  | -0.266 | 0.000  | 1.480  | 0.456  | 1.190  |
| Q9CQJ8 | Ndufb9   | 0.003 | 0.033 | -0.196 | 0.220  | 0.000  | 0.740  | 0.744  | 0.811  |
| P97742 | Cpt1a    | 0.015 | 0.076 | 0.000  | 0.296  | -0.452 | 0.925  | 0.756  | 0.903  |
| P47738 | Aldh2    | 0.815 | 1.000 | 0.398  | 0.000  | -0.923 | 0.773  | -0.269 | -0.602 |
| Q9Z2I8 | Suclg2   | 0.566 | 0.835 | 0.026  | 0.000  | -0.159 | 0.510  | -0.235 | 0.016  |
| Q9DCX2 | Atp5h    | 0.025 | 0.101 | 0.000  | 0.466  | -0.336 | 1.070  | 1.120  | 0.719  |
| Q8VE22 | Mrps23   | 0.006 | 0.044 | -0.054 | 0.132  | 0.000  | 0.889  | 0.501  | 0.810  |
| Q9D404 | Oxsm     | 0.917 | 1.000 | 0.000  | 0.611  | -0.220 | 0.234  | 0.026  | 0.045  |
| Q99JB2 | Stoml2   | 0.007 | 0.048 | 0.000  | 0.206  | -0.196 | 0.991  | 0.626  | 0.828  |
| P59017 | Bcl2l13  | 0.118 | 0.274 | 0.000  | -0.077 | 0.194  | -0.067 | -0.784 | -0.362 |
| Q8BGH2 | Samm50   | 0.000 | 0.013 | 0.000  | 0.083  | -0.194 | 0.973  | 0.871  | 0.934  |
| Q9CZR8 | Tsfm     | 0.707 | 0.983 | 0.245  | 0.000  | -0.207 | 0.426  | -0.475 | -0.282 |
| Q6PB66 | Lrpprc   | 0.035 | 0.125 | 0.000  | 0.121  | -0.292 | 0.941  | 0.428  | 0.430  |
| O09111 | Ndufb11  | 0.001 | 0.018 | 0.019  | -0.197 | 0.000  | 0.578  | 0.575  | 0.648  |
| Q9D6R2 | Idh3a    | 0.546 | 0.814 | 0.000  | 0.280  | -0.166 | 0.748  | -0.097 | 0.040  |
| Q9CQ92 | Fis1     | 0.078 | 0.209 | 0.240  | -0.067 | 0.000  | -0.226 | -0.500 | -0.127 |
| Q78PY7 | Snd1     | 0.431 | 0.687 | 0.121  | 0.000  | -0.224 | 0.151  | -0.543 | -0.309 |
| P29758 | Oat      | 0.001 | 0.018 | 0.000  | 0.170  | -0.473 | 1.810  | 1.920  | 2.200  |
| O08749 | Dld      | 0.005 | 0.039 | 0.000  | 0.188  | -0.179 | 0.904  | 0.625  | 0.763  |
| P38647 | Hspa9    | 0.072 | 0.196 | 0.035  | 0.000  | -0.356 | 1.510  | 0.407  | 0.498  |
| P63038 | Hspd1    | 0.006 | 0.044 | 0.000  | 0.119  | -0.240 | 1.090  | 0.650  | 0.822  |
| Q9DBL1 | Acadsb   | 0.001 | 0.022 | 0.000  | 0.020  | -0.201 | 1.980  | 1.390  | 1.380  |
| Q9Z2I0 | Letm1    | 0.002 | 0.025 | 0.000  | 0.057  | -0.198 | 0.565  | 0.495  | 0.591  |
| Q07813 | Bax      | 0.323 | 0.559 | -0.110 | 0.000  | 0.085  | 0.671  | -0.114 | 0.210  |
| Q99JY0 | Hadhb    | 0.462 | 0.721 | -0.070 | 0.350  | 0.000  | 0.625  | -0.024 | 0.237  |
| Q9Z110 | Aldh18a1 | 0.109 | 0.261 | 0.000  | 0.052  | -0.331 | 1.350  | 0.197  | 0.449  |
| Q8VDK1 | Nit1     | 0.269 | 0.488 | 0.029  | 0.000  | -0.100 | -0.074 | -0.053 | -0.391 |
| Q9CPY7 | Lap3     | 0.806 | 1.000 | 0.158  | 0.000  | -0.383 | 0.568  | -0.516 | 0.000  |
| Q8BH59 | Slc25a12 | 0.037 | 0.127 | -0.084 | 0.153  | 0.000  | 0.368  | 0.204  | 0.480  |
| Q9ROX4 | Acot9    | 0.058 | 0.171 | 0.000  | 0.694  | -0.021 | 1.030  | 0.770  | 0.829  |
| Q8BWT1 | Acaa2    | 0.089 | 0.228 | 0.000  | 0.088  | -0.212 | 0.592  | 0.136  | 0.245  |
| Q99N84 | Mrps18b  | 0.001 | 0.019 | -0.100 | 0.262  | 0.000  | 1.290  | 1.020  | 1.220  |
| Q99LX0 | Park7    | 0.001 | 0.015 | 0.016  | -0.257 | 0.000  | -1.140 | -1.450 | -1.350 |
| Q9CQ06 | Mrpl24   | 0.031 | 0.115 | 0.158  | 0.000  | -0.175 | 0.302  | 0.820  | 0.865  |
| P47740 | Aldh3a2  | 0.057 | 0.169 | 0.000  | 0.097  | -0.121 | 0.310  | 0.102  | 0.328  |
| Q9CPV4 | Glod4    | 0.023 | 0.096 | 0.000  | 0.150  | -0.049 | -0.326 | -0.824 | -0.470 |
| Q9D0L7 | Armc10   | 0.027 | 0.107 | -0.131 | 0.052  | 0.000  | -0.301 | -0.431 | -0.208 |
| Q9CR61 | Ndufb7   | 0.020 | 0.088 | 0.000  | -0.043 | 0.113  | 0.717  | 0.435  | 1.080  |

|        |          |       |       |        |        |        |        |        |        |
|--------|----------|-------|-------|--------|--------|--------|--------|--------|--------|
| Q9DC69 | Ndufa9   | 0.004 | 0.037 | -0.072 | 0.102  | 0.000  | 0.741  | 0.442  | 0.635  |
| Q9CQN1 | Trap1    | 0.459 | 0.719 | 0.170  | 0.000  | -0.139 | 0.175  | -0.335 | -0.254 |
| Q9Z2Z6 | Slc25a20 | 0.006 | 0.043 | 0.161  | 0.000  | -0.081 | 0.953  | 0.633  | 0.619  |
| Q921H8 | Acaa1a   | 0.168 | 0.349 | 0.077  | 0.000  | -0.377 | 0.732  | -0.098 | 0.503  |
| Q9ERS2 | Ndufa13  | 0.056 | 0.168 | 0.038  | -0.179 | 0.000  | 0.652  | 0.143  | 0.876  |
| P19783 | Cox4i1   | 0.004 | 0.038 | 0.100  | -0.024 | 0.000  | 0.711  | 0.422  | 0.696  |
| Q9CZ42 | Naxd     | 0.001 | 0.018 | 0.148  | 0.000  | -0.050 | 1.030  | 0.765  | 0.960  |
| Q99LC3 | Ndufa10  | 0.006 | 0.047 | 0.000  | 0.010  | -0.249 | 0.718  | 0.460  | 0.860  |
| Q8R2Y8 | Pthr2    | 0.015 | 0.077 | -0.265 | 0.190  | 0.000  | 1.240  | 1.150  | 2.290  |
| Q8R4N0 | Clybl    | 0.061 | 0.177 | 0.182  | 0.000  | -0.138 | 0.704  | 0.176  | 0.694  |
| O88696 | Clpp     | 0.016 | 0.078 | 0.000  | 0.043  | -0.364 | 0.863  | 0.401  | 0.665  |
| Q80Y81 | Elac2    | 0.624 | 0.899 | 0.000  | -0.208 | 0.155  | 0.131  | -0.831 | 0.116  |
| Q9CRD0 | Ociad1   | 0.184 | 0.372 | -0.379 | 0.247  | 0.000  | -0.636 | -0.622 | -0.097 |
| Q64105 | Spr      | 0.003 | 0.033 | -0.370 | 0.096  | 0.000  | -1.650 | -1.710 | -1.160 |
| P09528 | Fth1     | 0.085 | 0.220 | 0.442  | -0.233 | 0.000  | -0.225 | -1.190 | -0.715 |
| Q9DB77 | Uqcrc2   | 0.140 | 0.306 | 0.000  | 0.125  | -0.097 | 0.556  | 0.046  | 0.312  |
| Q61425 | Hadh     | 0.375 | 0.623 | -0.733 | 0.214  | 0.000  | 0.578  | 0.284  | -0.255 |
| Q99MN9 | Pccb     | 0.003 | 0.032 | 0.000  | 0.238  | -0.023 | 0.894  | 0.712  | 1.040  |
| Q8BMS1 | Hadha    | 0.932 | 1.000 | 0.027  | 0.000  | -0.269 | 0.492  | -0.475 | -0.178 |
| P38060 | Hmgcl    | 0.061 | 0.177 | 0.000  | 0.148  | -0.178 | 0.592  | 0.202  | 0.328  |
| Q9CZ13 | Uqcrc1   | 0.015 | 0.076 | 0.081  | 0.000  | -0.051 | 0.660  | 0.292  | 0.464  |
| Q922W5 | Pycr1    | 0.000 | 0.014 | 0.208  | 0.000  | -0.219 | 2.510  | 1.920  | 2.420  |
| P97287 | Mcl1     | 0.225 | 0.427 | 0.197  | 0.000  | -0.777 | 0.487  | -0.153 | 1.300  |
| P50544 | Acadvl   | 0.245 | 0.456 | 0.000  | 0.061  | -0.285 | 0.866  | -0.022 | 0.132  |
| Q8CAQ8 | Immt     | 0.003 | 0.032 | 0.000  | 0.109  | -0.145 | 0.915  | 0.583  | 0.795  |
| P56480 | Atp5b    | 0.009 | 0.057 | 0.000  | 0.258  | -0.162 | 0.723  | 0.568  | 0.808  |
| Q9CYG7 | Tomm34   | 0.013 | 0.071 | -0.013 | 0.210  | 0.000  | -0.338 | -0.800 | -0.588 |
| O35857 | Timm44   | 0.016 | 0.078 | 0.231  | 0.000  | -0.162 | 0.827  | 0.450  | 0.765  |
| Q8CC88 | Vwa8     | 0.942 | 1.000 | 0.000  | 0.045  | -0.313 | 0.847  | -0.752 | -0.481 |
| Q91VD9 | Ndufs1   | 0.002 | 0.025 | 0.000  | 0.197  | -0.065 | 0.847  | 0.648  | 0.786  |
| Q8BFR5 | Tufm     | 0.440 | 0.697 | 0.165  | 0.000  | -0.339 | 0.256  | -0.698 | -0.598 |
| Q14C51 | Ptcd3    | 0.001 | 0.019 | 0.000  | 0.011  | -0.187 | 0.717  | 0.554  | 0.741  |
| Q9QX60 | Dguok    | 0.708 | 0.984 | -0.077 | 0.150  | 0.000  | 0.044  | -0.050 | 0.196  |
| Q9JL8  | Sars2    | 0.446 | 0.703 | 0.281  | 0.000  | -0.050 | 0.559  | -0.022 | 0.196  |
| Q99JR1 | Sfxn1    | 0.018 | 0.083 | 0.000  | 0.180  | -0.179 | 0.403  | 0.408  | 0.393  |
| Q80Y14 | Glr5     | 0.112 | 0.265 | 0.079  | 0.000  | -0.218 | 0.910  | 0.185  | 0.266  |
| P50136 | Bckdha   | 0.099 | 0.243 | 0.030  | 0.000  | -0.341 | 0.421  | 0.014  | 0.389  |
| P54071 | Idh2     | 0.004 | 0.036 | 0.054  | 0.000  | -0.276 | 1.440  | 0.889  | 0.986  |
| Q9WTP7 | Ak3      | 0.037 | 0.129 | -0.146 | 0.101  | 0.000  | 0.809  | 0.233  | 0.598  |
| Q6NVE9 | Pptc7    | 0.557 | 0.825 | 0.000  | -0.054 | 0.016  | 0.205  | -0.490 | -0.140 |
| Q7TMF3 | Ndufa12  | 0.011 | 0.064 | -0.161 | 0.000  | 0.141  | 0.792  | 0.547  | 1.110  |
| O35465 | Fkbp8    | 0.521 | 0.786 | 0.000  | 0.167  | -0.029 | 0.317  | -0.227 | -0.452 |
| Q60932 | Vdac1    | 0.006 | 0.046 | 0.000  | 0.313  | -0.052 | 1.240  | 1.010  | 1.700  |
| Q60597 | Ogdh     | 0.007 | 0.048 | 0.000  | 0.044  | -0.239 | 0.747  | 0.432  | 0.587  |
| Q78IK4 | Apool    | 0.010 | 0.060 | -0.061 | 0.205  | 0.000  | 0.712  | 0.459  | 0.823  |



|        |          |       |       |        |        |        |        |        |        |
|--------|----------|-------|-------|--------|--------|--------|--------|--------|--------|
| Q91YT0 | Ndufv1   | 0.001 | 0.019 | 0.000  | 0.034  | -0.076 | 0.817  | 0.553  | 0.688  |
| Q91ZA3 | Pcca     | 0.004 | 0.037 | 0.000  | 0.273  | -0.086 | 0.822  | 0.667  | 0.847  |
| Q3UV70 | Pdp1     | 0.009 | 0.056 | -0.168 | 0.000  | 0.071  | 0.763  | 0.401  | 0.775  |
| P51174 | Acadl    | 0.039 | 0.132 | 0.000  | 0.343  | -0.012 | 0.526  | 0.424  | 0.475  |
| Q8K4Z3 | Naxe     | 0.013 | 0.071 | 0.012  | 0.000  | -0.125 | 0.324  | 0.340  | 0.156  |
| Q99KI0 | Aco2     | 0.135 | 0.299 | 0.000  | 0.042  | -0.166 | 0.553  | 0.087  | 0.138  |
| P26443 | Glud1    | 0.007 | 0.048 | -0.208 | 0.207  | 0.000  | 0.756  | 0.579  | 0.813  |
| Q8BMF4 | Dlat     | 0.002 | 0.025 | 0.000  | 0.245  | -0.070 | 1.060  | 0.823  | 1.080  |
| Q9Z219 | Sucla2   | 0.144 | 0.311 | 0.045  | 0.000  | -0.226 | 0.968  | 0.063  | 0.320  |
| Q9DCS9 | Ndufb10  | 0.006 | 0.043 | 0.000  | 0.250  | -0.106 | 0.628  | 0.918  | 0.805  |
| Q99MN1 | Kars     | 0.095 | 0.237 | 0.000  | 0.246  | -0.487 | -0.474 | -0.558 | -0.660 |
| Q8R123 | Flad1    | 0.186 | 0.376 | 0.107  | 0.000  | -0.001 | -0.107 | -0.914 | -0.144 |
| Q9JMH6 | Txnrd1   | 0.030 | 0.114 | 0.000  | -0.115 | 0.093  | -0.408 | -1.270 | -1.320 |
| Q9D2G2 | Dlst     | 0.003 | 0.033 | 0.000  | 0.150  | -0.204 | 0.862  | 0.626  | 0.867  |
| Q80ZK0 | Mrps10   | 0.027 | 0.107 | 0.000  | 0.562  | -0.484 | 1.350  | 0.904  | 1.690  |
| Q9CRB9 | Chchd3   | 0.005 | 0.039 | -0.052 | 0.233  | 0.000  | 0.868  | 0.646  | 1.000  |
| Q9DAM5 | Slc25a19 | 0.512 | 0.776 | 0.000  | 0.235  | -0.215 | 0.146  | 0.162  | -1.530 |
| Q99J39 | Mlycd    | 0.122 | 0.280 | 0.000  | 0.662  | -0.127 | 0.733  | 0.678  | 0.583  |
| P08228 | Sod1     | 0.000 | 0.013 | -0.224 | 0.010  | 0.000  | -1.080 | -1.290 | -1.170 |
| Q99LC5 | Etfa     | 0.310 | 0.542 | 0.000  | 0.213  | -0.198 | 0.705  | -0.164 | 0.467  |
| Q8BH04 | Pck2     | 0.009 | 0.056 | 0.068  | 0.000  | -0.323 | 1.320  | 0.741  | 0.823  |
| Q9Z0V7 | Timm17b  | 0.705 | 0.982 | 0.000  | -0.059 | 0.096  | 0.339  | -0.298 | 0.243  |
| Q9WTQ8 | Timm23   | 0.001 | 0.017 | 0.000  | 0.198  | -0.057 | 0.799  | 0.774  | 0.865  |
| P28352 | Apex1    | 0.028 | 0.107 | 0.000  | -0.288 | 0.047  | -0.452 | -0.881 | -0.582 |
| Q80XN0 | Bdh1     | 0.208 | 0.404 | 0.000  | 0.147  | -0.057 | 0.047  | -0.615 | -0.246 |
| Q8BVI4 | Qdpr     | 0.149 | 0.319 | 0.000  | -0.293 | 0.016  | -0.220 | -0.562 | -0.276 |
| Q9CQ62 | Decr1    | 0.431 | 0.687 | -0.053 | 0.110  | 0.000  | 0.728  | -0.038 | 0.024  |
| Q9WV85 | Nme3     | 0.093 | 0.234 | 0.001  | -0.129 | 0.000  | -0.343 | -0.578 | -0.122 |
| Q99J99 | Mpst     | 0.334 | 0.571 | 0.163  | 0.000  | -0.160 | 0.378  | -0.932 | -0.891 |
| Q3UQ84 | Tars2    | 0.008 | 0.053 | 0.000  | 0.010  | -0.095 | 0.543  | 0.329  | 0.293  |
| Q8CD10 | Micu2    | 0.000 | 0.014 | -0.023 | 0.080  | 0.000  | 1.030  | 0.770  | 0.952  |
| Q8JZN5 | Acad9    | 0.215 | 0.412 | 0.000  | 0.153  | -0.210 | 0.571  | 0.123  | 0.083  |
| Q91V61 | Sfxn3    | 0.006 | 0.043 | -0.166 | 0.192  | 0.000  | 0.721  | 0.546  | 0.762  |
| Q91WD5 | Ndufs2   | 0.006 | 0.045 | 0.000  | 0.406  | -0.118 | 0.946  | 0.914  | 1.040  |
| Q8BKZ9 | Pdhx     | 0.019 | 0.086 | 0.000  | 0.072  | -0.571 | 0.880  | 0.548  | 0.654  |
| Q8VCF0 | Mavs     | 0.900 | 1.000 | -0.276 | 0.000  | 0.068  | -0.034 | -0.283 | 0.051  |
| Q60930 | Vdac2    | 0.002 | 0.023 | 0.000  | 0.161  | -0.063 | 1.040  | 0.946  | 1.360  |
| Q8K009 | Aldh1l2  | 0.000 | 0.014 | 0.838  | 0.000  | -0.233 | 4.520  | 3.900  | 4.030  |
| Q3UJU9 | Rmdn3    | 0.332 | 0.570 | 0.215  | 0.000  | -0.020 | -0.077 | -0.868 | 0.115  |
| Q61941 | Nnt      | 0.000 | 0.013 | 1.030  | -0.638 | 0.000  | 5.910  | 5.440  | 5.700  |
| Q9D0S9 | Hint2    | 0.816 | 1.000 | 0.000  | 1.130  | -1.100 | -0.268 | 1.220  | -0.316 |
| Q921S7 | Mrpl37   | 0.249 | 0.462 | 0.174  | 0.000  | -0.144 | 0.783  | -0.030 | 0.302  |
| Q3V3R1 | Mthfd1l  | 0.570 | 0.839 | 0.201  | 0.000  | -0.215 | 0.497  | -0.751 | -0.501 |
| Q8K411 | Pitrm1   | 0.003 | 0.030 | 0.219  | 0.000  | -0.224 | 1.320  | 0.923  | 1.190  |
| Q9D1L0 | Chchd2   | 0.596 | 0.869 | -0.345 | 0.000  | 0.075  | 0.112  | -1.140 | 0.029  |

|        |          |       |       |        |        |        |        |        |        |
|--------|----------|-------|-------|--------|--------|--------|--------|--------|--------|
| Q9QYR9 | Acot2    | 0.001 | 0.018 | -0.148 | 0.041  | 0.000  | 0.854  | 0.676  | 0.934  |
| Q9JHW2 | Nit2     | 0.309 | 0.542 | -0.141 | 0.431  | 0.000  | 0.296  | 0.245  | 0.362  |
| Q9DB20 | Atp5o    | 0.001 | 0.019 | 0.000  | 0.129  | -0.067 | 0.904  | 0.673  | 0.901  |
| O08709 | Prdx6    | 0.003 | 0.031 | 0.085  | 0.000  | -0.156 | -1.090 | -1.810 | -1.670 |
| Q8BIJ6 | lars2    | 0.008 | 0.053 | 0.000  | 0.073  | -0.104 | 0.819  | 0.408  | 0.655  |
| Q9DC61 | Pmpca    | 0.012 | 0.068 | 0.000  | 0.351  | -0.158 | 1.180  | 0.802  | 0.788  |
| Q99L13 | Hibadh   | 0.000 | 0.014 | 0.000  | 0.215  | -0.163 | 1.320  | 1.240  | 1.450  |
| Q03265 | Atp5a1   | 0.002 | 0.025 | 0.000  | 0.050  | -0.113 | 0.804  | 0.540  | 0.809  |
| Q9QXX4 | Slc25a13 | 0.004 | 0.038 | -0.014 | 0.047  | 0.000  | 0.518  | 0.393  | 0.699  |
| O35855 | Bcat2    | 0.331 | 0.569 | 0.049  | 0.000  | -0.484 | 0.516  | -0.134 | 0.039  |
| Q9CQC7 | Ndufb4   | 0.005 | 0.039 | 0.000  | 0.250  | -0.034 | 0.719  | 0.760  | 0.569  |
| Q8CGK3 | Lonp1    | 0.159 | 0.335 | 0.242  | 0.000  | -0.158 | 1.280  | 0.204  | 0.415  |
| Q8VEM8 | Slc25a3  | 0.001 | 0.019 | 0.000  | 0.026  | -0.130 | 1.170  | 0.803  | 0.950  |
| Q9D051 | Pdhb     | 0.332 | 0.570 | 0.000  | 0.004  | -0.255 | 0.792  | -0.134 | 0.064  |
| Q9CYR0 | Ssbp1    | 0.351 | 0.592 | 0.000  | 0.077  | 0.000  | 0.385  | -0.069 | 0.185  |
| Q64521 | Gpd2     | 0.010 | 0.061 | 0.000  | 0.125  | -0.395 | 0.903  | 0.600  | 0.693  |
| Q9Z0X1 | Aifm1    | 0.917 | 1.000 | 0.000  | 0.036  | -0.025 | 0.160  | -0.134 | 0.015  |
| Q8K1R3 | Pnpt1    | 0.333 | 0.571 | 0.128  | 0.000  | -0.456 | 1.050  | 0.609  | -0.428 |
| Q91V92 | Acly     | 0.836 | 1.000 | 0.521  | 0.000  | -0.217 | 0.528  | -0.126 | 0.096  |
| Q9WUM5 | Suclg1   | 0.579 | 0.850 | 0.279  | 0.000  | -0.064 | 1.160  | -0.031 | -0.140 |
| Q8K2B3 | Sdha     | 0.017 | 0.081 | 0.000  | 0.002  | -0.204 | 0.722  | 0.297  | 0.454  |
| P67778 | Phb      | 0.003 | 0.033 | 0.000  | 0.017  | -0.309 | 0.843  | 0.579  | 0.735  |
| Q922Q4 | Pycr2    | 0.016 | 0.078 | 0.102  | 0.000  | -0.106 | 1.190  | 0.520  | 0.764  |
| Q61102 | Abcb7    | 0.585 | 0.857 | -0.410 | 0.169  | 0.000  | 0.145  | -0.268 | 0.316  |
| P47802 | Mtx1     | 0.295 | 0.522 | 0.000  | 0.014  | -0.282 | 0.283  | -0.076 | 0.042  |
| P08249 | Mdh2     | 0.023 | 0.096 | -0.067 | 0.250  | 0.000  | 0.700  | 0.373  | 0.737  |
| P42125 | Eci1     | 0.192 | 0.384 | 0.000  | 0.429  | -0.075 | 0.361  | 0.416  | 0.326  |
| O35143 | Atpif1   | 0.013 | 0.069 | 0.259  | 0.000  | -0.321 | 1.590  | 1.150  | 0.813  |
| P84084 | Arf5     | 0.092 | 0.233 | 0.000  | 0.100  | -0.067 | -0.116 | -1.250 | -0.806 |
| O35972 | Mrpl23   | 0.003 | 0.033 | 0.000  | 0.107  | -0.240 | 0.886  | 0.665  | 0.669  |
| Q9D0D3 | Mtpap    | 0.039 | 0.134 | -0.042 | 0.000  | 0.411  | 0.553  | 0.544  | 0.831  |
| Q9D6S7 | Mrrf     | 0.086 | 0.223 | 0.000  | 0.433  | -0.651 | 0.785  | 0.917  | 0.434  |
| Q9CXT8 | Pmpcb    | 0.017 | 0.082 | 0.000  | 0.156  | -0.441 | 1.050  | 0.643  | 0.643  |
| Q8CHT0 | Aldh4a1  | 0.875 | 1.000 | 0.335  | -0.067 | 0.000  | 1.090  | -0.715 | -0.397 |
| Q9D1N9 | Mrpl21   | 0.001 | 0.019 | 0.000  | 0.089  | -0.218 | 0.892  | 0.811  | 1.010  |
| Q8QZT1 | Acat1    | 0.050 | 0.156 | 0.000  | 0.181  | -0.006 | 0.765  | 0.228  | 0.592  |
| Q9DCS3 | Mecr     | 0.121 | 0.279 | 0.000  | 0.207  | -0.206 | 1.210  | 0.269  | 0.392  |
| Q3ULD5 | Mccc2    | 0.004 | 0.036 | 0.000  | 0.315  | -0.197 | 1.080  | 0.893  | 0.981  |
| Q9DCC8 | Tomm20   | 0.641 | 0.917 | -0.090 | 0.350  | 0.000  | 0.068  | 0.058  | 0.398  |
| P55096 | Abcd3    | 0.092 | 0.232 | 0.042  | 0.000  | -0.929 | 1.360  | 1.060  | 0.053  |
| P32020 | Scp2     | 0.103 | 0.248 | 0.172  | 0.000  | -0.126 | 0.611  | 0.091  | 0.465  |
| P19096 | Fasn     | 0.558 | 0.826 | 0.157  | 0.000  | -0.066 | 0.282  | -0.464 | -0.161 |
| Q8BH95 | Echs1    | 0.035 | 0.124 | 0.000  | 0.240  | -0.097 | 0.915  | 0.414  | 0.524  |
| P56391 | Cox6b1   | 0.015 | 0.076 | 0.029  | 0.000  | -0.083 | 0.406  | 0.174  | 0.409  |
| Q99N96 | Mrpl1    | 0.091 | 0.231 | 0.000  | -1.980 | 0.201  | 0.820  | 0.852  | 1.270  |

|        |          |       |       |        |        |        |        |        |        |
|--------|----------|-------|-------|--------|--------|--------|--------|--------|--------|
| Q99KE1 | Me2      | 0.952 | 1.000 | 0.000  | 0.140  | -0.205 | 0.190  | -0.212 | -0.072 |
| Q60931 | Vdac3    | 0.007 | 0.050 | 0.000  | 0.252  | -0.058 | 1.080  | 0.902  | 1.570  |
| P09925 | Surf1    | 0.000 | 0.013 | 0.069  | 0.000  | -0.073 | 0.682  | 0.590  | 0.722  |
| Q8BMD8 | Slc25a24 | 0.023 | 0.096 | -0.447 | 0.176  | 0.000  | 0.526  | 0.574  | 0.757  |
| P11352 | Gpx1     | 0.131 | 0.294 | 0.457  | 0.000  | -0.235 | -0.028 | -0.804 | -0.877 |
| P54116 | Stom     | 0.556 | 0.825 | 0.677  | 0.000  | -0.243 | 0.446  | -0.539 | -0.245 |
| P99029 | Prdx5    | 0.996 | 1.000 | 0.234  | 0.000  | -0.266 | 0.051  | -0.201 | 0.121  |
| Q07417 | Acads    | 0.730 | 1.000 | 0.089  | 0.000  | -0.125 | 0.435  | -0.537 | -0.263 |
| P12787 | Cox5a    | 0.002 | 0.028 | 0.000  | 0.139  | -0.028 | 0.629  | 0.454  | 0.629  |
| Q9D0M3 | Cyc1     | 0.192 | 0.384 | 0.243  | 0.000  | -0.038 | 0.016  | 0.587  | 0.597  |
| Q80X85 | Mrps7    | 0.051 | 0.158 | 0.000  | 0.066  | -0.627 | 0.765  | 0.358  | 0.418  |
| P35486 | Pdha1    | 0.264 | 0.482 | 0.044  | 0.000  | -0.235 | 0.792  | 0.073  | -0.010 |
| Q1HFZ0 | Nsun2    | 0.102 | 0.247 | 0.289  | 0.000  | -0.086 | -0.029 | -1.110 | -0.849 |
| Q61171 | Prdx2    | 0.040 | 0.134 | 0.088  | 0.000  | -0.208 | -0.353 | -0.755 | -0.402 |
| Q8K3A0 | Hscb     | 0.378 | 0.627 | 0.020  | 0.000  | -7.410 | -0.071 | 0.082  | -0.054 |
| Q9D6K5 | Synj2bp  | 0.056 | 0.167 | 0.000  | 0.262  | -0.061 | 0.573  | 0.279  | 0.805  |
| Q61576 | Fkbp10   | 0.000 | 0.014 | 0.444  | -0.772 | 0.000  | 4.040  | 3.680  | 3.950  |
| Q9QZD8 | Slc25a10 | 0.003 | 0.030 | 0.000  | 0.214  | -0.415 | 1.190  | 1.260  | 1.510  |
| Q61733 | Mrps31   | 0.132 | 0.296 | 0.000  | 0.114  | -0.108 | 0.841  | -0.005 | 0.687  |
| Q9CQH3 | Ndufb5   | 0.003 | 0.032 | 0.000  | 0.202  | -0.151 | 0.682  | 0.684  | 0.812  |
| Q9Z1J3 | Nfs1     | 0.866 | 1.000 | 0.239  | 0.000  | -0.042 | 0.878  | -0.349 | -0.124 |
| P58059 | Mrps21   | 0.054 | 0.163 | 0.000  | 0.089  | -0.066 | 0.647  | 0.140  | 0.589  |
| P53395 | Dbt      | 0.046 | 0.149 | 0.000  | 0.286  | -0.049 | 0.968  | 0.326  | 0.859  |
| Q9ESW4 | Agk      | 0.183 | 0.372 | 0.000  | -0.572 | 0.077  | 0.527  | -0.141 | 0.703  |
| O89110 | Casp8    | 0.012 | 0.067 | 0.166  | -0.032 | 0.000  | -1.050 | -1.120 | -2.060 |
| Q9CZ83 | Mrpl55   | 0.003 | 0.031 | 0.173  | 0.000  | -0.267 | 0.903  | 0.758  | 0.928  |
| Q9DCT2 | Ndufs3   | 0.021 | 0.090 | -0.343 | 0.080  | 0.000  | 0.597  | 0.506  | 1.070  |
| P51660 | Hsd17b4  | 0.034 | 0.122 | 0.027  | 0.000  | -0.287 | 1.110  | 0.293  | 0.795  |
| Q8VCW8 | Acsf2    | 0.374 | 0.623 | 0.347  | -0.053 | 0.000  | 0.597  | -1.130 | -0.804 |
| Q8K1J6 | Trnt1    | 0.089 | 0.227 | -0.056 | 0.000  | 0.076  | -0.250 | -0.666 | -0.153 |
| Q9CPR5 | Mrpl15   | 0.032 | 0.119 | 0.144  | -1.190 | 0.000  | 1.030  | 0.900  | 1.190  |
| Q9DCW4 | Etfb     | 0.322 | 0.558 | 0.252  | 0.000  | -0.128 | 0.867  | -0.052 | 0.291  |
| Q8VD26 | Tmem143  | 0.001 | 0.022 | -0.252 | 0.062  | 0.000  | 0.775  | 0.891  | 1.040  |
| Q9CQ54 | Ndufc2   | 0.001 | 0.022 | 0.044  | 0.000  | -0.180 | 0.889  | 0.645  | 0.923  |
| Q9CQ75 | Ndufa2   | 0.016 | 0.078 | -0.063 | 0.189  | 0.000  | 0.742  | 0.367  | 0.640  |
| P09671 | Sod2     | 0.023 | 0.096 | -0.061 | 0.348  | 0.000  | 0.715  | 0.476  | 0.682  |
| P08074 | Cbr2     | 0.001 | 0.019 | 0.000  | 0.042  | -1.580 | 5.280  | 4.340  | 4.610  |
| Q99LP6 | Grpel1   | 0.003 | 0.030 | 0.000  | 0.185  | -0.177 | 1.010  | 0.736  | 0.977  |
| Q9CR62 | Slc25a11 | 0.026 | 0.105 | 0.013  | 0.000  | -0.081 | 0.658  | 0.233  | 0.369  |
| P45952 | Acadm    | 0.441 | 0.697 | 0.020  | 0.000  | -0.423 | 0.852  | -0.186 | -0.129 |
| Q80ZS3 | Mrps26   | 0.050 | 0.155 | -0.354 | 0.562  | 0.000  | 0.950  | 0.666  | 0.952  |
| Q9Z2Q5 | Mrpl40   | 0.003 | 0.031 | 0.154  | -0.056 | 0.000  | 0.713  | 0.525  | 0.546  |
| Q924T2 | Mrps2    | 0.014 | 0.073 | 0.000  | 0.348  | -0.330 | 0.736  | 1.060  | 0.937  |
| Q9CQA3 | Sdhb     | 0.005 | 0.042 | 0.000  | 0.126  | -0.143 | 0.648  | 0.433  | 0.552  |
| Q9D3P8 | Plgrkt   | 0.012 | 0.069 | -0.004 | 0.232  | 0.000  | 0.479  | 0.379  | 0.528  |

|        |          |       |       |        |        |        |        |        |        |
|--------|----------|-------|-------|--------|--------|--------|--------|--------|--------|
| P05202 | Got2     | 0.002 | 0.028 | 0.000  | 0.188  | -0.073 | 0.799  | 0.617  | 0.665  |
| O08756 | Hsd17b10 | 0.087 | 0.224 | -0.012 | 0.447  | 0.000  | 0.862  | 0.393  | 0.563  |
| Q64133 | Maoa     | 0.000 | 0.011 | 0.151  | 0.000  | -0.761 | 3.640  | 3.580  | 3.770  |
| P22315 | Fech     | 0.179 | 0.364 | 0.378  | -1.300 | 0.000  | 1.010  | 0.491  | 0.277  |
| Q9CPQ8 | Atp5l    | 0.001 | 0.022 | -0.234 | 0.085  | 0.000  | 0.683  | 0.763  | 0.798  |
| Q3UMR5 | Mcu      | 0.004 | 0.038 | 0.000  | 0.207  | -0.231 | 0.923  | 0.701  | 0.918  |
| Q9WUR2 | Eci2     | 0.392 | 0.641 | -0.002 | 0.400  | 0.000  | 0.637  | 0.088  | 0.274  |
| Q61578 | Fdxr     | 0.099 | 0.243 | 0.000  | 0.172  | -0.061 | -0.043 | -0.801 | -0.540 |
| Q8JZQ2 | Afg3l2   | 0.015 | 0.076 | 0.000  | 0.089  | -0.109 | 0.828  | 0.358  | 0.590  |
| Q9D880 | Timm50   | 0.034 | 0.123 | 0.000  | 0.165  | -0.056 | 0.558  | 0.221  | 0.486  |
| Q9D855 | Uqcrb    | 0.013 | 0.069 | 0.000  | 0.173  | -0.233 | 0.669  | 0.448  | 0.554  |
| Q5M8N4 | Sdr39u1  | 0.975 | 1.000 | -0.090 | 1.850  | 0.000  | -0.753 | 1.040  | 1.390  |
| P19536 | Cox5b    | 0.287 | 0.512 | -0.201 | 0.104  | 0.000  | 0.204  | -0.054 | 0.216  |
| Q791V5 | Mtch2    | 0.007 | 0.048 | 0.000  | 0.565  | -0.017 | 1.160  | 1.140  | 1.190  |
| Q8BFP9 | Pdk1     | 0.386 | 0.634 | 0.043  | 0.000  | -0.101 | 0.101  | -0.625 | -0.165 |
| Q9EQ20 | Aldh6a1  | 0.368 | 0.615 | 0.300  | 0.000  | -0.150 | 1.460  | -0.061 | 0.226  |
| Q8K2M0 | Mrpl38   | 0.002 | 0.024 | 0.114  | 0.000  | -0.089 | 0.995  | 0.671  | 0.855  |
| P16125 | Ldhb     | 0.000 | 0.013 | -0.212 | 0.132  | 0.000  | -1.330 | -1.570 | -1.550 |
| Q9DC50 | Crot     | 0.119 | 0.276 | 0.000  | -0.124 | 0.034  | -0.050 | -0.367 | -0.340 |
| O35435 | Dhodh    | 0.072 | 0.196 | 0.000  | 0.359  | -1.330 | 0.638  | 1.240  | 1.160  |
| O88441 | Mtx2     | 0.276 | 0.496 | 0.000  | 0.113  | -0.108 | 0.703  | -0.135 | 0.393  |
| Q8BJ03 | Cox15    | 0.015 | 0.075 | 0.000  | -0.638 | 0.346  | 1.240  | 1.100  | 1.810  |
| Q8R164 | Bphl     | 0.031 | 0.114 | 0.197  | 0.000  | -0.133 | 0.714  | 0.305  | 0.778  |
| Q920E5 | Fdps     | 0.104 | 0.252 | 1.020  | 0.000  | -0.336 | 1.880  | 0.878  | 1.120  |
| Q9DBF1 | Aldh7a1  | 0.000 | 0.009 | 0.000  | 0.318  | -0.191 | 2.700  | 2.460  | 2.520  |
| Q99MR8 | Mccc1    | 0.382 | 0.631 | 0.014  | 0.000  | -0.317 | 0.811  | -0.251 | 0.108  |
| Q9WVL0 | Gstz1    | 0.112 | 0.265 | 0.000  | 0.163  | -0.024 | 1.190  | 0.487  | 0.239  |
| Q922H2 | Pdk3     | 0.193 | 0.385 | 0.065  | 0.000  | -0.219 | 0.781  | -0.001 | 0.229  |
| Q9JMA2 | Qtrt1    | 0.001 | 0.019 | 0.000  | 0.059  | -0.158 | -0.700 | -0.758 | -0.891 |
| Q8VCX5 | Micu1    | 0.567 | 0.836 | -0.165 | 0.177  | 0.000  | 1.300  | -0.698 | 0.513  |
| Q99M87 | Dnaja3   | 0.029 | 0.112 | 0.003  | 0.000  | -0.329 | 0.713  | 0.216  | 0.625  |
| Q9CQ40 | Mrpl49   | 0.092 | 0.233 | 0.339  | 0.000  | -0.837 | 0.637  | 0.883  | 0.445  |
| Q8R3F5 | Mcat     | 0.181 | 0.368 | 0.020  | 0.000  | -0.178 | 0.816  | -0.052 | 0.333  |
| Q9DCN2 | Cyb5r3   | 0.000 | 0.005 | 0.000  | 0.161  | -0.051 | 2.080  | 1.950  | 2.120  |
| Q9DB15 | Mrpl12   | 0.006 | 0.044 | 0.000  | 0.110  | -0.240 | 0.803  | 0.551  | 0.609  |
| Q99NB1 | Acss1    | 0.101 | 0.247 | 0.000  | 0.064  | -0.261 | -0.149 | -0.573 | -0.593 |
| Q9EQI8 | Mrpl46   | 0.017 | 0.081 | 0.194  | 0.000  | -0.083 | 1.000  | 0.471  | 0.691  |
| Q8C163 | Exog     | 0.071 | 0.194 | -0.225 | 0.654  | 0.000  | 0.703  | 0.765  | 1.070  |
| Q5U458 | Dnajc11  | 0.066 | 0.185 | 0.771  | -0.042 | 0.000  | 1.780  | 1.580  | 0.657  |
| O08600 | Endog    | 0.058 | 0.171 | -0.172 | 0.406  | 0.000  | -0.439 | -0.313 | -0.402 |
| O35459 | Ech1     | 0.045 | 0.146 | 0.000  | 0.120  | -0.262 | 0.291  | 0.279  | 0.264  |
| P47968 | Rpia     | 0.160 | 0.337 | 0.718  | -0.577 | 0.000  | -0.741 | -2.220 | -0.389 |
| Q8VD00 | Lars2    | 0.390 | 0.640 | 0.288  | 0.000  | -4.090 | 0.945  | -0.292 | -0.213 |
| Q3UHB1 | Nt5dc3   | 0.001 | 0.014 | 0.000  | 0.448  | -0.077 | 2.160  | 2.160  | 2.560  |
| Q9DCJ5 | Ndufa8   | 0.075 | 0.202 | 0.000  | 1.300  | -0.142 | 1.220  | 1.620  | 2.010  |

|        |          |       |       |        |        |        |        |        |        |
|--------|----------|-------|-------|--------|--------|--------|--------|--------|--------|
| Q9R257 | Hebp1    | 0.892 | 1.000 | 0.000  | 0.167  | -1.940 | 1.520  | -2.900 | -1.030 |
| Q921G7 | Etfdh    | 0.009 | 0.055 | 0.011  | 0.000  | -0.217 | 0.785  | 0.394  | 0.573  |
| Q9JHS4 | Clpx     | 0.557 | 0.825 | 0.335  | 0.000  | -0.328 | 1.540  | -0.635 | 0.363  |
| Q8BK72 | Mrps27   | 0.012 | 0.068 | 0.000  | 0.528  | -0.256 | 1.200  | 1.050  | 1.510  |
| Q8BW75 | Maob     | 0.000 | 0.013 | 0.667  | 0.000  | -0.370 | 4.120  | 3.720  | 4.010  |
| Q922S4 | Pde2a    | 0.073 | 0.199 | 0.280  | -0.058 | 0.000  | -0.909 | -2.760 | -0.790 |
| P48962 | Slc25a4  | 0.000 | 0.013 | 0.000  | 0.359  | -0.136 | 2.120  | 1.860  | 2.070  |
| Q9CQX2 | Cyb5b    | 0.013 | 0.071 | -0.164 | 0.064  | 0.000  | 0.975  | 0.423  | 0.947  |
| Q9CPQ3 | Tomm22   | 0.010 | 0.061 | -0.029 | 0.000  | 0.186  | 1.040  | 0.523  | 0.946  |
| P70349 | Hint1    | 0.003 | 0.030 | -0.064 | 0.000  | 0.148  | -1.010 | -1.670 | -1.260 |
| P18155 | Mthfd2   | 0.034 | 0.122 | 0.000  | 0.357  | -0.941 | 0.795  | 1.290  | 1.380  |
| Q9DCZ4 | Apoo     | 0.004 | 0.037 | 0.000  | 0.124  | -0.197 | 0.733  | 0.566  | 0.860  |
| Q9DCM0 | Ethe1    | 0.636 | 0.912 | 0.000  | 0.137  | -0.820 | 0.135  | -0.445 | 0.180  |
| Q99N93 | Mrpl16   | 0.172 | 0.355 | 0.000  | 0.020  | -0.274 | 0.737  | -0.068 | 0.326  |
| P62897 | Cycs     | 0.205 | 0.401 | 0.000  | 0.081  | -0.533 | -0.300 | -0.469 | -0.708 |
| Q9D964 | Gatm     | 0.821 | 1.000 | 0.770  | 0.000  | -0.380 | 0.678  | 0.053  | -0.044 |
| P31786 | Dbi      | 0.001 | 0.019 | 0.000  | 0.100  | -0.167 | -1.290 | -1.720 | -1.290 |
| Q9DCU6 | Mrpl4    | 0.041 | 0.138 | 0.000  | 0.039  | -0.885 | 0.969  | 0.968  | 0.394  |
| Q9CR58 | Slc25a30 | 0.011 | 0.062 | 0.000  | 0.243  | -0.162 | 0.866  | 0.561  | 0.664  |
| Q791T5 | Mtch1    | 0.001 | 0.019 | 0.000  | 0.409  | -0.005 | 1.910  | 1.480  | 1.660  |
| Q9DB70 | Fundc1   | 0.256 | 0.470 | -0.517 | 1.650  | 0.000  | 2.470  | 0.712  | 1.270  |
| Q9CXZ1 | Ndufs4   | 0.012 | 0.067 | -0.105 | 0.323  | 0.000  | 0.881  | 0.660  | 1.120  |
| Q9JK81 | Myg1     | 0.012 | 0.068 | -0.941 | 0.000  | 0.003  | -1.670 | -1.890 | -1.610 |
| Q9CQN7 | Mrpl41   | 0.001 | 0.019 | -0.057 | 0.242  | 0.000  | 1.080  | 0.872  | 1.000  |
| O35129 | Phb2     | 0.003 | 0.030 | 0.000  | 0.062  | -0.164 | 0.922  | 0.591  | 0.718  |
| P97823 | Lypla1   | 0.168 | 0.350 | 0.000  | -0.250 | 0.196  | 0.058  | -1.140 | -0.961 |
| Q9CXW2 | Mrps22   | 0.536 | 0.803 | 0.837  | -1.070 | 0.000  | 1.960  | 1.660  | -1.400 |
| Q91VT4 | Cbr4     | 0.890 | 1.000 | 0.000  | 0.188  | -0.136 | 0.418  | -0.152 | -0.122 |
| Q9JKF7 | Mrpl39   | 0.494 | 0.759 | 0.000  | -3.790 | 0.010  | 1.100  | -0.144 | -1.440 |
| Q91VR2 | Atp5c1   | 0.035 | 0.125 | 0.127  | 0.000  | -0.028 | 1.150  | 0.535  | 0.475  |
| Q62425 | Ndufa4   | 0.219 | 0.419 | -0.214 | 0.210  | 0.000  | 0.195  | 0.073  | 0.541  |
| Q9D5T0 | Atad1    | 0.387 | 0.636 | 0.005  | -0.010 | 0.000  | 0.504  | -0.072 | 0.068  |
| Q9JKX6 | Nudt5    | 0.000 | 0.014 | 0.033  | -0.029 | 0.000  | -1.110 | -1.520 | -1.260 |
| Q8QZS1 | Hibch    | 0.404 | 0.655 | 0.000  | 0.318  | -0.092 | 0.156  | 0.135  | 0.318  |
| Q99L04 | Dhrs1    | 0.470 | 0.729 | 0.040  | 0.000  | -0.227 | 0.315  | -0.898 | -0.478 |
| Q99KB8 | Hagh     | 0.754 | 1.000 | 0.142  | 0.000  | -0.442 | -0.018 | -0.512 | -0.014 |
| Q9JLJ2 | Aldh9a1  | 0.081 | 0.213 | 0.030  | -0.088 | 0.000  | -0.239 | -1.410 | -0.779 |
| Q91VS7 | Mgst1    | 0.030 | 0.113 | 0.999  | 0.000  | -0.245 | 1.580  | 1.500  | 2.410  |
| Q91VM9 | Ppa2     | 0.070 | 0.193 | -0.028 | 0.474  | 0.000  | 0.613  | 0.457  | 0.874  |
| Q9D8P4 | Mrpl17   | 0.062 | 0.179 | -0.135 | 0.609  | 0.000  | 0.806  | 0.896  | 0.632  |
| P47791 | Gsr      | 0.018 | 0.084 | 0.341  | 0.000  | -0.118 | -0.466 | -1.080 | -1.080 |
| Q9JLT4 | Txnrd2   | 0.839 | 1.000 | 0.000  | 0.351  | -0.041 | 0.125  | 0.029  | 0.247  |
| Q9CQ69 | Uqcrcq   | 0.004 | 0.038 | 0.000  | 0.165  | -0.022 | 0.638  | 0.470  | 0.464  |
| Q9CZU6 | Cs       | 0.005 | 0.041 | 0.000  | 0.137  | -0.034 | 0.868  | 0.509  | 0.669  |
| O88967 | Yme111   | 0.017 | 0.081 | 0.000  | -0.237 | 0.021  | 0.822  | 0.328  | 0.838  |

|        |          |       |       |        |        |        |        |        |        |
|--------|----------|-------|-------|--------|--------|--------|--------|--------|--------|
| Q811U4 | Mfn1     | 0.420 | 0.674 | 0.000  | 1.260  | -0.739 | 2.090  | 1.140  | -0.275 |
| Q99J47 | Dhrs7b   | 0.010 | 0.059 | 0.000  | 0.380  | -0.485 | 1.100  | 1.150  | 1.120  |
| Q9D6J5 | Ndufb8   | 0.039 | 0.132 | -0.884 | 0.149  | 0.000  | 0.958  | 0.797  | 0.597  |
| Q8BJ64 | Chdh     | 0.375 | 0.623 | 0.970  | -0.135 | 0.000  | 0.659  | -1.190 | -0.567 |
| Q9CQN6 | Tmem14c  | 0.066 | 0.186 | 0.146  | 0.000  | -0.210 | 0.760  | 0.282  | 0.302  |
| Q9CQL5 | Mrpl18   | 0.012 | 0.067 | -0.027 | 0.185  | 0.000  | 0.925  | 0.512  | 1.060  |
| Q8R2Q4 | Gfm2     | 0.142 | 0.309 | 0.000  | 0.144  | -0.128 | 0.042  | -1.100 | -0.903 |
| Q8JZU2 | Slc25a1  | 0.000 | 0.012 | 0.000  | 0.212  | -0.083 | 1.600  | 1.430  | 1.730  |
| Q8BU88 | Mrpl22   | 0.017 | 0.080 | 0.003  | -0.068 | 0.000  | 0.895  | 0.346  | 0.595  |
| P53702 | Hccs     | 0.001 | 0.022 | -0.130 | 0.313  | 0.000  | 1.420  | 1.460  | 1.860  |
| P36552 | Cpox     | 0.116 | 0.271 | 0.330  | 0.000  | -0.246 | -0.140 | -0.571 | -0.479 |
| Q9D0G0 | Mrps30   | 0.012 | 0.068 | 0.000  | 0.044  | -0.091 | 1.010  | 0.479  | 0.609  |
| Q9QYA2 | Tomm40   | 0.010 | 0.059 | 0.000  | 0.202  | -0.235 | 1.300  | 0.723  | 0.891  |
| Q8BYM8 | Cars2    | 0.412 | 0.665 | 0.076  | 0.000  | -0.350 | 0.743  | -0.258 | 0.119  |
| Q8BTX9 | Hsd1l    | 0.769 | 1.000 | 0.000  | 0.163  | -0.252 | 0.135  | -0.129 | 0.040  |
| Q8JZN7 | Rhot2    | 0.010 | 0.061 | 0.084  | 0.000  | -0.204 | 0.554  | 0.327  | 0.480  |
| Q9CXJ4 | Abcb8    | 0.014 | 0.074 | 0.000  | 0.642  | -0.065 | 1.350  | 1.020  | 1.280  |
| Q91WS0 | Cisd1    | 0.396 | 0.646 | -0.215 | 1.180  | 0.000  | 0.469  | 0.808  | 0.987  |
| O09174 | Amacr    | 0.030 | 0.113 | 0.000  | 0.612  | -0.235 | 1.240  | 0.949  | 0.900  |
| Q9D7N3 | Mrps9    | 0.122 | 0.280 | 0.267  | -0.306 | 0.000  | 1.060  | 0.047  | 1.140  |
| Q8BWM0 | Ptges2   | 0.946 | 1.000 | -1.850 | 2.870  | 0.000  | 1.240  | 0.282  | -0.189 |
| Q99PU8 | Dhx30    | 0.416 | 0.670 | 0.000  | 0.380  | -0.875 | 1.330  | -0.133 | -0.053 |
| Q3URS9 | Ccdc51   | 0.007 | 0.048 | 0.194  | 0.000  | -0.221 | 0.635  | 0.568  | 0.670  |
| Q9DC70 | Ndufs7   | 0.005 | 0.040 | 0.000  | 0.110  | -0.184 | 0.684  | 0.466  | 0.575  |
| Q9EP89 | Lactb    | 0.009 | 0.055 | 0.000  | 0.227  | -0.004 | 0.611  | 0.438  | 0.673  |
| Q9D3D9 | Atp5d    | 0.126 | 0.287 | -0.224 | 0.095  | 0.000  | 0.573  | 0.056  | 0.267  |
| O88986 | Gcat     | 0.640 | 0.917 | -0.398 | 0.000  | 0.308  | 0.250  | -0.442 | -0.349 |
| Q9JH15 | Ivd      | 0.333 | 0.571 | 0.000  | 0.127  | -0.011 | 0.544  | -0.052 | 0.212  |
| Q9CPP6 | Ndufa5   | 0.245 | 0.456 | -0.536 | 0.555  | 0.000  | 0.694  | 0.147  | 0.649  |
| O55125 | Nipsnap1 | 0.039 | 0.134 | -0.109 | 0.000  | 0.160  | 0.335  | 0.199  | 0.384  |
| Q8BX10 | Pgam5    | 0.212 | 0.409 | -0.303 | 0.066  | 0.000  | 0.400  | -0.081 | 0.256  |
| P48410 | Abcd1    | 0.804 | 1.000 | 0.401  | -0.082 | 0.000  | 0.518  | -0.244 | 0.258  |
| Q9WTP6 | Ak2      | 0.009 | 0.057 | 0.187  | 0.000  | -0.011 | -0.394 | -0.833 | -0.616 |
| Q8BG51 | Rhot1    | 0.015 | 0.076 | 0.000  | 0.146  | -0.220 | 0.857  | 0.556  | 0.462  |
| Q60759 | Gcdh     | 0.450 | 0.708 | 0.000  | 0.355  | -0.371 | 0.773  | -0.053 | 0.092  |
| P20108 | Prdx3    | 0.006 | 0.046 | 0.214  | -0.058 | 0.000  | 0.778  | 0.509  | 0.675  |
| Q3U2A8 | Vars2    | 0.089 | 0.227 | 0.000  | 0.110  | -0.376 | 0.144  | 0.368  | 0.307  |
| Q80YD1 | Supv3l1  | 0.046 | 0.149 | 0.000  | 0.195  | -0.039 | 0.533  | 0.318  | 0.254  |
| Q99KK9 | Hars2    | 0.327 | 0.564 | 0.000  | 0.815  | -0.658 | 0.593  | 0.065  | 1.500  |
| Q91V12 | Acot7    | 0.020 | 0.089 | -0.038 | 0.193  | 0.000  | 0.736  | 0.449  | 0.396  |
| Q8BHF7 | Pgs1     | 0.017 | 0.080 | 0.000  | 1.120  | -0.175 | 2.030  | 1.790  | 2.010  |
| Q8K3J1 | Ndufs8   | 0.002 | 0.025 | 0.000  | 0.081  | -0.026 | 0.747  | 0.504  | 0.553  |
| Q64433 | Hspe1    | 0.001 | 0.018 | 0.000  | 0.100  | -0.080 | 1.090  | 0.779  | 0.991  |
| Q8K0D5 | Gfm1     | 0.253 | 0.467 | 0.000  | 0.253  | -0.248 | 1.020  | 0.078  | 0.217  |
| Q99N94 | Mrpl9    | 0.093 | 0.234 | 0.142  | 0.000  | -0.854 | 1.030  | 0.602  | 0.221  |

|        |           |       |       |        |        |        |        |        |        |
|--------|-----------|-------|-------|--------|--------|--------|--------|--------|--------|
| Q8C3X2 | Ccdc90b   | 0.005 | 0.040 | -0.005 | 0.303  | 0.000  | 1.660  | 1.020  | 1.250  |
| Q99N87 | Mrps5     | 0.000 | 0.012 | 0.039  | 0.000  | -0.040 | 1.140  | 0.934  | 0.888  |
| P51881 | Slc25a5   | 0.203 | 0.400 | 0.000  | 1.090  | -0.121 | 0.477  | 1.260  | 1.440  |
| Q8R1S0 | Coq6      | 0.178 | 0.364 | 0.000  | 0.621  | -0.148 | 0.936  | 0.515  | 0.414  |
| Q9DBL7 | Coasy     | 0.134 | 0.298 | 7.440  | -0.978 | 0.000  | 7.090  | 7.330  | 7.010  |
| Q5HZI9 | Slc25a51  | 0.018 | 0.083 | -0.031 | 0.632  | 0.000  | 1.200  | 0.956  | 1.100  |
| Q91VC9 | Ghitm     | 0.003 | 0.030 | 0.000  | 0.088  | -0.147 | 1.130  | 0.700  | 0.953  |
| Q8CAK1 | Iba57     | 0.322 | 0.558 | 0.036  | 0.000  | -0.449 | 0.439  | -0.205 | 0.176  |
| Q9D6K8 | Fundc2    | 0.013 | 0.071 | 0.000  | 0.474  | -0.255 | 1.690  | 1.410  | 0.958  |
| O08807 | Prdx4     | 0.256 | 0.470 | 0.038  | 0.000  | -0.002 | 0.439  | -0.070 | 0.262  |
| Q9QZ23 | Nfu1      | 0.022 | 0.094 | 0.000  | 0.235  | -0.727 | 1.080  | 0.755  | 1.350  |
| P51175 | Ppox      | 0.909 | 1.000 | 0.000  | 0.082  | -0.711 | 0.651  | -0.730 | -0.373 |
| Q9JHR7 | Ide       | 0.004 | 0.036 | 0.000  | 0.341  | -0.020 | -0.764 | -0.819 | -0.576 |
| Q9D1P0 | Mrpl13    | 0.522 | 0.787 | 0.000  | 0.348  | -0.702 | 0.959  | -0.679 | 0.596  |
| Q8K1M6 | Dnm1l     | 0.892 | 1.000 | 0.042  | 0.000  | -0.313 | 0.147  | -0.185 | -0.310 |
| Q8K4X7 | Agpat4    | 0.005 | 0.042 | 0.000  | 0.300  | -0.338 | 1.030  | 0.953  | 1.130  |
| Q9CZL5 | Pcbd2     | 0.058 | 0.171 | 0.028  | 0.000  | -0.711 | 0.373  | 0.407  | 0.453  |
| P48771 | Cox7a2    | 0.957 | 1.000 | -0.456 | 0.000  | 0.309  | 0.089  | -0.409 | 0.125  |
| P70404 | Idh3g     | 0.775 | 1.000 | 0.000  | 0.070  | -0.248 | 0.756  | -0.504 | -0.078 |
| Q9D6Y7 | Msra      | 0.068 | 0.189 | 0.549  | -0.217 | 0.000  | -0.252 | -0.768 | -0.814 |
| P40630 | Tfam      | 0.889 | 1.000 | 0.483  | 0.000  | -0.272 | 0.049  | 0.003  | 0.264  |
| P97386 | Lig3      | 0.578 | 0.849 | 0.068  | 0.000  | -0.173 | 0.026  | -0.596 | 0.058  |
| Q4VAE3 | Tmem65    | 0.014 | 0.072 | 0.000  | 0.487  | -0.336 | 1.190  | 1.030  | 1.570  |
| P56135 | Atp5j2    | 0.005 | 0.040 | 0.000  | 0.393  | -0.087 | 0.924  | 1.130  | 0.968  |
| Q9DCM2 | Gstk1     | 0.701 | 0.977 | 0.010  | 0.000  | -0.212 | 0.377  | -0.571 | -0.378 |
| Q9D0C4 | Trmt5     | 0.109 | 0.260 | -0.090 | 0.320  | 0.000  | -0.850 | -4.670 | -1.540 |
| Q924L1 | Letmd1    | 0.672 | 0.950 | -1.210 | 0.847  | 0.000  | -1.630 | 0.966  | -1.040 |
| Q9D8S4 | Rexo2     | 0.107 | 0.257 | -0.191 | 0.000  | 0.052  | 0.356  | 0.007  | 0.431  |
| Q7TSQ8 | Pdpr      | 0.166 | 0.347 | 0.000  | 0.234  | -0.035 | 1.070  | 0.066  | 0.599  |
| Q9D7B6 | Acad8     | 0.170 | 0.353 | 0.000  | -1.970 | 0.001  | 1.380  | 0.114  | 0.357  |
| Q8K370 | Acad10    | 0.053 | 0.162 | 0.324  | 0.000  | -0.339 | 0.796  | 0.651  | 0.382  |
| P70677 | Casp3     | 0.003 | 0.030 | -0.016 | 0.138  | 0.000  | -1.190 | -2.040 | -1.570 |
| P61922 | Abat      | 0.014 | 0.073 | 0.000  | 1.570  | -1.050 | 4.160  | 3.100  | 3.540  |
| Q9CQZ6 | Ndufb3    | 0.002 | 0.025 | -0.037 | 0.054  | 0.000  | 0.800  | 0.535  | 0.580  |
| Q9D6M3 | Slc25a22  | 0.001 | 0.016 | 0.000  | 0.088  | -0.280 | 1.510  | 1.170  | 1.410  |
| Q9D2R6 | Coa3      | 0.017 | 0.080 | 0.000  | 0.304  | -0.248 | 1.120  | 0.611  | 0.904  |
| P47934 | Crat      | 0.395 | 0.644 | 0.000  | -3.600 | 0.145  | 2.180  | -1.640 | 0.743  |
| Q91WK1 | Spryd4    | 0.045 | 0.146 | 0.000  | 0.231  | -0.354 | 0.951  | 0.398  | 0.566  |
| Q9CQE1 | Nipsnap3b | 0.179 | 0.365 | 0.000  | 0.874  | -0.677 | 0.769  | 0.963  | 0.692  |
| Q9WVD5 | Slc25a15  | 0.005 | 0.042 | -0.508 | 0.364  | 0.000  | 1.270  | 1.750  | 1.660  |
| Q91Z53 | Grhpr     | 0.060 | 0.176 | 0.000  | -0.087 | 0.077  | -0.125 | -0.652 | -0.656 |
| Q91VA6 | Poldip2   | 0.121 | 0.278 | 0.000  | 0.211  | -1.280 | 1.200  | 0.544  | 0.335  |
| Q9Z1P6 | Ndufa7    | 0.004 | 0.037 | -0.044 | 0.000  | 0.010  | 1.000  | 0.554  | 0.732  |
| P58281 | Opa1      | 0.111 | 0.263 | -0.010 | 0.051  | 0.000  | -0.089 | -0.563 | -0.194 |
| Q8VDT9 | Mrpl50    | 0.179 | 0.365 | 0.195  | -2.670 | 0.000  | 0.890  | 0.464  | 0.716  |

|        |            |       |       |        |        |        |        |        |        |
|--------|------------|-------|-------|--------|--------|--------|--------|--------|--------|
| Q8K215 | Lyrm4      | 0.019 | 0.086 | 0.000  | 0.224  | -0.231 | 0.718  | 0.439  | 0.602  |
| Q9JLZ3 | Auh        | 0.243 | 0.453 | 0.028  | 0.000  | -0.092 | 0.540  | -0.170 | 0.570  |
| Q8BGA9 | Oxa1l      | 0.039 | 0.133 | 0.000  | -1.550 | 0.191  | 1.400  | 1.020  | 1.330  |
| Q8BUY5 | Timmdc1    | 0.012 | 0.067 | 0.000  | 0.616  | -0.099 | 1.080  | 1.290  | 1.470  |
| Q9ERB0 | Snap29     | 0.440 | 0.697 | 0.870  | -3.570 | 0.000  | 0.006  | 0.284  | 0.520  |
| O54918 | Bcl2l11    | 0.580 | 0.851 | 0.000  | 0.199  | -0.024 | 0.457  | -0.129 | 0.176  |
| Q9D8Y1 | Tmem126a   | 0.000 | 0.011 | 0.000  | 0.009  | -0.058 | 1.380  | 1.100  | 1.350  |
| Q3TL44 | Nlr1       | 0.072 | 0.196 | 0.000  | 0.222  | -0.158 | 0.479  | 0.242  | 0.303  |
| Q9CZN8 | Qrsl1      | 0.705 | 0.982 | 0.000  | 0.121  | -0.527 | 0.510  | -0.341 | -0.174 |
| Q91VN4 | Chchd6     | 0.012 | 0.068 | 0.000  | 0.253  | -1.110 | 1.520  | 1.500  | 1.590  |
| Q9WU56 | Pus1       | 0.903 | 1.000 | 2.900  | -0.702 | 0.000  | 2.620  | 0.251  | -1.290 |
| Q71RI9 | Kyat3      | 0.016 | 0.079 | 0.000  | 0.041  | -0.711 | 0.821  | 0.680  | 0.805  |
| O88587 | Comt       | 0.014 | 0.072 | -0.457 | 0.392  | 0.000  | 1.030  | 0.947  | 1.110  |
| Q9D338 | Mrpl19     | 0.721 | 1.000 | 0.000  | -0.168 | 0.031  | 1.100  | -0.582 | -0.080 |
| Q8BIP0 | Dars2      | 0.009 | 0.056 | 0.571  | -0.292 | 0.000  | 1.550  | 1.440  | 2.180  |
| Q99LB2 | Dhrs4      | 0.046 | 0.147 | 0.000  | 0.173  | -0.424 | 1.020  | 0.369  | 0.601  |
| Q8C5H8 | Nadk2      | 0.914 | 1.000 | 0.228  | 0.000  | -0.004 | 0.494  | -0.258 | -0.095 |
| Q9CQE3 | Mrps17     | 0.067 | 0.187 | 0.000  | 1.020  | -0.199 | 0.968  | 1.420  | 1.540  |
| Q9JKL4 | Ndufaf3    | 0.124 | 0.284 | 0.000  | -1.040 | 0.623  | 0.737  | 0.694  | 1.040  |
| Q8BHC4 | Dcakd      | 0.017 | 0.081 | 0.466  | 0.000  | -1.560 | 2.210  | 1.810  | 2.370  |
| Q9D116 | Mrpl14     | 0.431 | 0.687 | 0.279  | 0.000  | -0.206 | 0.925  | -0.016 | 0.044  |
| P41216 | Acsl1      | 0.926 | 1.000 | 0.000  | 0.371  | -0.869 | 0.044  | 0.090  | -0.768 |
| P52503 | Ndufs6     | 0.095 | 0.237 | -0.325 | 0.000  | 0.739  | 0.967  | 0.626  | 1.040  |
| Q3U186 | Rars2      | 0.906 | 1.000 | 0.398  | -0.283 | 0.000  | 1.060  | -0.833 | -0.334 |
| Q3U5Q7 | Cmpk2      | 0.171 | 0.354 | 0.545  | 0.000  | -0.063 | 0.143  | -0.649 | -0.640 |
| Q8BK08 | Tmem11     | 0.001 | 0.019 | -0.043 | 0.285  | 0.000  | 1.080  | 0.954  | 1.080  |
| Q60649 | Clpb       | 0.990 | 1.000 | 0.421  | 0.000  | -0.108 | 0.340  | -0.304 | 0.289  |
| Q3TC33 | Ccdc127    | 0.031 | 0.114 | -0.180 | 0.197  | 0.000  | 0.651  | 0.308  | 0.506  |
| Q9CY73 | Mrpl44     | 0.009 | 0.057 | 0.000  | 0.358  | -0.175 | 0.827  | 0.770  | 0.815  |
| Q80U63 | Mfn2       | 1.000 | 1.000 | 0.000  | 0.057  | -0.064 | -0.674 | 0.298  | 0.369  |
| Q9DC71 | Mrps15     | 0.711 | 0.987 | -0.194 | 0.000  | 0.044  | 0.841  | -0.657 | 0.193  |
| Q9CR59 | Gadd45gip1 | 0.130 | 0.293 | 0.000  | 0.151  | -0.194 | 0.895  | 0.031  | 0.578  |
| Q8BVU5 | Nudt9      | 0.155 | 0.330 | 0.000  | -0.351 | 0.224  | 0.896  | 2.140  | 0.088  |
| Q2TPA8 | Hsdl2      | 0.861 | 1.000 | 0.190  | -0.464 | 0.000  | 0.705  | -0.463 | -0.284 |
| Q9D8S9 | Bola1      | 0.460 | 0.719 | 0.000  | -2.370 | 0.187  | 1.050  | -0.214 | -0.646 |
| Q9CR68 | Uqcrfs1    | 0.007 | 0.048 | 0.000  | 0.074  | -0.106 | 0.656  | 0.355  | 0.524  |
| Q66GT5 | Ptpmt1     | 0.058 | 0.172 | 0.000  | 0.711  | -0.229 | 1.030  | 0.782  | 0.979  |
| Q9CQZ5 | Ndufa6     | 0.233 | 0.438 | 0.000  | 0.678  | -0.132 | 0.410  | 0.479  | 0.879  |
| Q99N89 | Mrpl43     | 0.003 | 0.030 | 0.000  | 0.185  | -0.319 | 1.180  | 0.974  | 1.330  |
| P56382 | Atp5e      | 0.000 | 0.013 | 0.000  | 0.115  | -0.081 | 0.914  | 0.754  | 0.858  |
| Q9WV84 | Nme4       | 0.027 | 0.105 | 1.300  | -1.640 | 0.000  | 3.340  | 2.630  | 2.720  |
| Q9D1B9 | Mrpl28     | 0.304 | 0.534 | 0.000  | 0.671  | -1.410 | 0.836  | 0.095  | 0.635  |
| Q8BIG7 | Comtd1     | 0.937 | 1.000 | 0.000  | 0.166  | -0.276 | 0.673  | -0.609 | -0.276 |
| Q5IRJ6 | Slc30a9    | 0.003 | 0.030 | 0.000  | 0.577  | -0.728 | 2.360  | 2.540  | 2.810  |
| Q924D0 | Rtn4ip1    | 0.540 | 0.807 | 0.000  | 0.155  | -0.927 | 0.162  | -2.980 | -0.090 |



|        |          |       |       |        |        |        |        |        |        |
|--------|----------|-------|-------|--------|--------|--------|--------|--------|--------|
| Q9D023 | Mpc2     | 0.034 | 0.121 | 0.000  | 0.091  | -0.908 | 0.954  | 0.558  | 0.976  |
| Q8K2Y7 | Mrpl47   | 0.048 | 0.152 | 0.000  | 0.273  | -0.157 | 1.070  | 0.895  | 0.325  |
| Q9CPQ1 | Cox6c    | 0.008 | 0.052 | 0.000  | 0.148  | -0.102 | 0.358  | 0.542  | 0.504  |
| Q99N85 | Mrps18a  | 0.010 | 0.060 | 0.176  | -0.091 | 0.000  | 0.951  | 0.506  | 0.708  |
| P63030 | Mpc1     | 0.002 | 0.028 | 0.158  | -0.024 | 0.000  | 1.540  | 0.979  | 1.210  |
| Q921N7 | Tmem70   | 0.029 | 0.111 | -0.295 | 3.890  | 0.000  | 5.300  | 5.780  | 6.340  |
| Q9CYK1 | Wars2    | 0.461 | 0.720 | -0.361 | 0.518  | 0.000  | 0.617  | -0.291 | 0.913  |
| Q61586 | Gpam     | 0.000 | 0.012 | 0.000  | -0.259 | 0.263  | 2.000  | 1.940  | 2.100  |
| Q8BYL4 | Yars2    | 0.539 | 0.807 | 0.319  | -1.240 | 0.000  | 0.125  | -1.890 | -0.671 |
| Q9ERI6 | Rdh14    | 0.189 | 0.379 | 0.000  | 0.132  | -0.126 | -0.072 | -0.191 | -0.680 |
| Q9D6U8 | Fam162a  | 0.000 | 0.013 | -0.044 | 0.195  | 0.000  | 1.030  | 0.901  | 0.963  |
| Q9D125 | Mrps25   | 0.125 | 0.285 | 5.570  | -3.410 | 0.000  | 6.160  | 5.650  | 5.610  |
| Q9DC29 | Abcb6    | 0.117 | 0.272 | 0.022  | -0.201 | 0.000  | -0.174 | -0.821 | -0.399 |
| Q9CZ57 | Nsun4    | 0.430 | 0.686 | 0.129  | -1.190 | 0.000  | 0.559  | -0.895 | 1.310  |
| Q9DAT5 | Trmu     | 0.965 | 1.000 | 0.330  | -0.121 | 0.000  | 0.746  | -0.391 | -0.095 |
| Q9D1R1 | Tmem126b | 0.441 | 0.698 | 0.146  | -0.371 | 0.000  | -0.573 | 0.779  | 0.798  |
| Q3TQB2 | Foxred1  | 0.796 | 1.000 | -0.086 | 0.930  | 0.000  | 0.212  | 0.095  | 0.873  |
| Q9CQ91 | Ndufa3   | 0.595 | 0.868 | -0.286 | 0.062  | 0.000  | 0.320  | -0.326 | 0.166  |
| Q99N95 | Mrpl3    | 0.067 | 0.187 | 0.000  | 0.558  | -0.395 | 1.000  | 0.576  | 0.857  |
| Q9DB10 | Smdt1    | 0.087 | 0.224 | -0.402 | 0.296  | 0.000  | 0.541  | 0.458  | 0.326  |

**Supp. Table 2.** Mitochondrial proteome was detected in CD4<sup>+</sup> T cells isolated from old mice after mito-transfer and in non-manipulated CD4<sup>+</sup> T cells from old mice. CD4<sup>+</sup> T cells from young and old mice, and from old mice after mito-transfer were cultured for 4 h before processing for mass spectrometry analysis. Data expressed as median protein Log2 fold change of CD4<sup>+</sup> T cells from old mice, from 3 individual old mice (paired experiment)

| Uniprot.ID | Gene.ID | P. Val | FDR   | O1     | O2     | O3     | OM1   | OM2    | OM3   |
|------------|---------|--------|-------|--------|--------|--------|-------|--------|-------|
| Q8JZN5     | Acad9   | 0.215  | 0.412 | 0.000  | 0.150  | -0.210 | 0.570 | 0.120  | 0.080 |
| Q9Z0X1     | Aifm1   | 0.917  | 1.000 | 0.000  | 0.040  | -0.030 | 0.160 | -0.130 | 0.010 |
| Q3TQB2     | Foxred1 | 0.796  | 1.000 | -0.090 | 0.930  | 0.000  | 0.210 | 0.100  | 0.870 |
| Q99LC3     | Ndufa10 | 0.006  | 0.047 | 0.000  | 0.010  | -0.250 | 0.720 | 0.460  | 0.860 |
| Q7TMF3     | Ndufa12 | 0.011  | 0.064 | -0.160 | 0.000  | 0.140  | 0.790 | 0.550  | 1.110 |
| Q9ERS2     | Ndufa13 | 0.056  | 0.168 | 0.040  | -0.180 | 0.000  | 0.650 | 0.140  | 0.880 |
| Q9CQ75     | Ndufa2  | 0.016  | 0.078 | -0.060 | 0.190  | 0.000  | 0.740 | 0.370  | 0.640 |

|        |          |       |       |        |        |        |        |        |       |
|--------|----------|-------|-------|--------|--------|--------|--------|--------|-------|
| Q9CQ91 | Ndufa3   | 0.595 | 0.868 | -0.290 | 0.060  | 0.000  | 0.320  | -0.330 | 0.170 |
| Q9CPP6 | Ndufa5   | 0.245 | 0.456 | -0.540 | 0.560  | 0.000  | 0.690  | 0.150  | 0.650 |
| Q9CQZ5 | Ndufa6   | 0.233 | 0.438 | 0.000  | 0.680  | -0.130 | 0.410  | 0.480  | 0.880 |
| Q9Z1P6 | Ndufa7   | 0.004 | 0.037 | -0.040 | 0.000  | 0.010  | 1.000  | 0.550  | 0.730 |
| Q9DCJ5 | Ndufa8   | 0.075 | 0.202 | 0.000  | 1.300  | -0.140 | 1.220  | 1.620  | 2.010 |
| Q9DC69 | Ndufa9   | 0.004 | 0.037 | -0.070 | 0.100  | 0.000  | 0.740  | 0.440  | 0.640 |
| Q9JKL4 | Ndufaf3  | 0.124 | 0.284 | 0.000  | -1.040 | 0.620  | 0.740  | 0.690  | 1.040 |
| Q9DCS9 | Ndufb10  | 0.006 | 0.043 | 0.000  | 0.250  | -0.110 | 0.630  | 0.920  | 0.810 |
| O09111 | Ndufb11  | 0.001 | 0.018 | 0.020  | -0.200 | 0.000  | 0.580  | 0.570  | 0.650 |
| Q9CQZ6 | Ndufb3   | 0.002 | 0.025 | -0.040 | 0.050  | 0.000  | 0.800  | 0.540  | 0.580 |
| Q9CQC7 | Ndufb4   | 0.005 | 0.039 | 0.000  | 0.250  | -0.030 | 0.720  | 0.760  | 0.570 |
| Q9CQH3 | Ndufb5   | 0.003 | 0.032 | 0.000  | 0.200  | -0.150 | 0.680  | 0.680  | 0.810 |
| Q9CR61 | Ndufb7   | 0.020 | 0.088 | 0.000  | -0.040 | 0.110  | 0.720  | 0.440  | 1.080 |
| Q9D6J5 | Ndufb8   | 0.039 | 0.132 | -0.880 | 0.150  | 0.000  | 0.960  | 0.800  | 0.600 |
| Q9CQJ8 | Ndufb9   | 0.003 | 0.033 | -0.200 | 0.220  | 0.000  | 0.740  | 0.740  | 0.810 |
| Q9CQ54 | Ndufc2   | 0.001 | 0.022 | 0.040  | 0.000  | -0.180 | 0.890  | 0.650  | 0.920 |
| Q91VD9 | Ndufs1   | 0.002 | 0.025 | 0.000  | 0.200  | -0.070 | 0.850  | 0.650  | 0.790 |
| Q91WD5 | Ndufs2   | 0.006 | 0.045 | 0.000  | 0.410  | -0.120 | 0.950  | 0.910  | 1.040 |
| Q9DCT2 | Ndufs3   | 0.021 | 0.090 | -0.340 | 0.080  | 0.000  | 0.600  | 0.510  | 1.070 |
| Q9CXZ1 | Ndufs4   | 0.012 | 0.067 | -0.110 | 0.320  | 0.000  | 0.880  | 0.660  | 1.120 |
| P52503 | Ndufs6   | 0.095 | 0.237 | -0.330 | 0.000  | 0.740  | 0.970  | 0.630  | 1.040 |
| Q9DC70 | Ndufs7   | 0.005 | 0.040 | 0.000  | 0.110  | -0.180 | 0.680  | 0.470  | 0.570 |
| Q8K3J1 | Ndufs8   | 0.002 | 0.025 | 0.000  | 0.080  | -0.030 | 0.750  | 0.500  | 0.550 |
| Q91YT0 | Ndufv1   | 0.001 | 0.019 | 0.000  | 0.030  | -0.080 | 0.820  | 0.550  | 0.690 |
| Q9D6J6 | Ndufv2   | 0.049 | 0.154 | 0.000  | 0.340  | -0.180 | 0.720  | 0.360  | 0.860 |
| Q8BUY5 | Timmdc1  | 0.012 | 0.067 | 0.000  | 0.620  | -0.100 | 1.080  | 1.290  | 1.470 |
| Q9D8Y1 | Tmem126a | 0.000 | 0.011 | 0.000  | 0.010  | -0.060 | 1.380  | 1.100  | 1.350 |
| Q9D1R1 | Tmem126b | 0.441 | 0.698 | 0.150  | -0.370 | 0.000  | -0.570 | 0.780  | 0.800 |
| Q921N7 | Tmem70   | 0.029 | 0.111 | -0.290 | 3.890  | 0.000  | 5.300  | 5.780  | 6.340 |
| Q8K2B3 | Sdha     | 0.017 | 0.081 | 0.000  | 0.000  | -0.200 | 0.720  | 0.300  | 0.450 |
| Q9CQA3 | Sdha     | 0.005 | 0.042 | 0.000  | 0.130  | -0.140 | 0.650  | 0.430  | 0.550 |
| Q9D0M3 | Cyc1     | 0.192 | 0.384 | 0.240  | 0.000  | -0.040 | 0.020  | 0.590  | 0.600 |
| Q9D855 | Uqcrb    | 0.013 | 0.069 | 0.000  | 0.170  | -0.230 | 0.670  | 0.450  | 0.550 |
| Q9CZ13 | Uqcrc1   | 0.015 | 0.076 | 0.080  | 0.000  | -0.050 | 0.660  | 0.290  | 0.460 |
| Q9DB77 | Uqcrc2   | 0.140 | 0.306 | 0.000  | 0.130  | -0.100 | 0.560  | 0.050  | 0.310 |
| Q9CR68 | Uqcrcs1  | 0.007 | 0.048 | 0.000  | 0.070  | -0.110 | 0.660  | 0.350  | 0.520 |
| Q9CQ69 | Uqcrcq   | 0.004 | 0.038 | 0.000  | 0.170  | -0.020 | 0.640  | 0.470  | 0.460 |
| Q9D2R6 | Coa3     | 0.017 | 0.080 | 0.000  | 0.300  | -0.250 | 1.120  | 0.610  | 0.900 |
| Q8BJ03 | Cox15    | 0.015 | 0.075 | 0.000  | -0.640 | 0.350  | 1.240  | 1.100  | 1.810 |
| P19783 | Cox4i1   | 0.004 | 0.038 | 0.100  | -0.020 | 0.000  | 0.710  | 0.420  | 0.700 |
| P12787 | Cox5a    | 0.002 | 0.028 | 0.000  | 0.140  | -0.030 | 0.630  | 0.450  | 0.630 |
| P19536 | Cox5b    | 0.287 | 0.512 | -0.200 | 0.100  | 0.000  | 0.200  | -0.050 | 0.220 |
| P56391 | Cox6b1   | 0.015 | 0.076 | 0.030  | 0.000  | -0.080 | 0.410  | 0.170  | 0.410 |
| Q9CPQ1 | Cox6c    | 0.008 | 0.052 | 0.000  | 0.150  | -0.100 | 0.360  | 0.540  | 0.500 |
| P48771 | Cox7a2   | 0.957 | 1.000 | -0.460 | 0.000  | 0.310  | 0.090  | -0.410 | 0.130 |

|        |        |       |       |        |       |        |       |       |       |
|--------|--------|-------|-------|--------|-------|--------|-------|-------|-------|
| Q62425 | Ndufa4 | 0.219 | 0.419 | -0.210 | 0.210 | 0.000  | 0.200 | 0.070 | 0.540 |
| P09925 | Surf1  | 0.000 | 0.013 | 0.070  | 0.000 | -0.070 | 0.680 | 0.590 | 0.720 |
| Q03265 | Atp5a1 | 0.002 | 0.025 | 0.000  | 0.050 | -0.110 | 0.800 | 0.540 | 0.810 |
| P56480 | Atp5b  | 0.009 | 0.057 | 0.000  | 0.260 | -0.160 | 0.720 | 0.570 | 0.810 |
| Q91VR2 | Atp5c1 | 0.035 | 0.125 | 0.130  | 0.000 | -0.030 | 1.150 | 0.540 | 0.470 |
| Q9D3D9 | Atp5d  | 0.126 | 0.287 | -0.220 | 0.090 | 0.000  | 0.570 | 0.060 | 0.270 |
| P56382 | Atp5e  | 0.000 | 0.013 | 0.000  | 0.120 | -0.080 | 0.910 | 0.750 | 0.860 |
| Q9DCX2 | Atp5h  | 0.025 | 0.101 | 0.000  | 0.470 | -0.340 | 1.070 | 1.120 | 0.720 |
| P97450 | Atp5j  | 0.033 | 0.121 | 0.000  | 0.130 | -0.630 | 1.010 | 0.420 | 1.140 |
| P56135 | Atp5j2 | 0.005 | 0.040 | 0.000  | 0.390 | -0.090 | 0.920 | 1.130 | 0.970 |
| Q9CPQ8 | Atp5l  | 0.001 | 0.022 | -0.230 | 0.080 | 0.000  | 0.680 | 0.760 | 0.800 |
| Q9DB20 | Atp5o  | 0.001 | 0.019 | 0.000  | 0.130 | -0.070 | 0.900 | 0.670 | 0.900 |
| O35143 | Atpif1 | 0.013 | 0.069 | 0.260  | 0.000 | -0.320 | 1.590 | 1.150 | 0.810 |
| Q921N7 | Tmem70 | 0.029 | 0.111 | -0.290 | 3.890 | 0.000  | 5.300 | 5.780 | 6.340 |

**Supp. Table 3.** Proteins related to ETC were detected in CD4<sup>+</sup> T cells isolated from old mice after mito-transfer and in non-manipulated CD4<sup>+</sup> T cells from old mice. CD4<sup>+</sup> T cells from young and old mice, and from old mice after mito-transfer were cultured for 4 h before processing for mass spectrometry analysis. Data expressed as median protein Log2 fold change of CD4<sup>+</sup> T cells from old mice, from 3 individual old mice (paired experiment)

| Uniprot ID | Gene ID | P.Val | FDR   | O1     | O2     | O3     | OM1    | OM2    | OM3    |
|------------|---------|-------|-------|--------|--------|--------|--------|--------|--------|
| Q9R1C7     | Prpf40a | 0.057 | 0.169 | 0.000  | 0.036  | -0.175 | -0.196 | -0.679 | -0.769 |
| Q9ES52     | Inpp5d  | 0.069 | 0.191 | -0.054 | 0.183  | 0.000  | -0.248 | -0.967 | -0.380 |
| Q9ERK4     | Cse1l   | 0.041 | 0.138 | 0.073  | -0.029 | 0.000  | -0.350 | -1.430 | -0.960 |
| Q9DBG6     | Rpn2    | 0.000 | 0.012 | 0.000  | 0.145  | -0.216 | 1.580  | 1.360  | 1.520  |
| Q9D358     | Acp1    | 0.010 | 0.060 | 0.000  | 0.034  | -0.377 | -0.763 | -1.300 | -1.250 |
| Q9CX99     | Grap    | 0.077 | 0.207 | -0.922 | 0.152  | 0.000  | -1.990 | -2.090 | -0.687 |
| Q99L45     | Eif2s2  | 0.540 | 0.807 | 0.342  | -0.259 | 0.000  | 0.266  | -0.631 | -0.179 |
| Q99JR1     | Sfxn1   | 0.018 | 0.083 | 0.000  | 0.180  | -0.179 | 0.403  | 0.408  | 0.393  |
| Q99JF8     | Psip1   | 0.090 | 0.230 | -0.095 | 0.000  | 0.152  | -0.474 | -0.546 | -0.054 |
| Q921F2     | Tardbp  | 0.080 | 0.211 | 0.004  | 0.000  | -0.021 | -0.142 | -0.728 | -0.349 |
| Q8QZY9     | Sf3b4   | 0.531 | 0.798 | -2.010 | 0.478  | 0.000  | -3.370 | -0.510 | -0.237 |
| Q8K4I3     | Arhgef6 | 0.010 | 0.058 | -0.259 | 0.000  | 0.183  | -0.812 | -1.510 | -1.100 |

|        |          |       |       |        |        |        |        |        |        |
|--------|----------|-------|-------|--------|--------|--------|--------|--------|--------|
| Q8K2Z4 | Ncapd2   | 0.437 | 0.694 | 0.059  | -0.356 | 0.000  | 0.217  | -0.607 | -0.761 |
| Q8K1I7 | Wipf1    | 0.146 | 0.315 | -0.001 | 0.000  | 0.402  | -0.311 | -0.419 | 0.062  |
| Q8CC88 | Vwa8     | 0.942 | 1.000 | 0.000  | 0.045  | -0.313 | 0.847  | -0.752 | -0.481 |
| Q8C3J5 | Dock2    | 0.006 | 0.047 | 0.009  | 0.000  | -0.011 | -0.628 | -1.100 | -0.665 |
| Q8C2K5 | Rasal3   | 0.018 | 0.083 | -0.082 | 0.141  | 0.000  | -0.512 | -1.320 | -0.924 |
| Q8BZN6 | Dock10   | 0.210 | 0.406 | -0.532 | 0.000  | 0.228  | -0.481 | -1.600 | -0.303 |
| Q8BK67 | Rcc2     | 0.253 | 0.466 | 0.487  | -0.092 | 0.000  | 0.079  | -0.473 | -0.172 |
| Q8BH59 | Slc25a12 | 0.037 | 0.127 | -0.084 | 0.153  | 0.000  | 0.368  | 0.204  | 0.480  |
| Q8BGW0 | Themis   | 0.127 | 0.288 | -1.320 | 0.000  | 0.443  | -1.890 | -1.260 | -1.100 |
| Q80SU7 | Gvin1    | 0.117 | 0.273 | 0.231  | 0.000  | -0.019 | 0.045  | -0.881 | -0.733 |
| Q78ZA7 | Nap1l4   | 0.009 | 0.056 | -0.293 | 0.000  | 0.003  | -0.919 | -1.530 | -0.967 |
| Q6ZQ38 | Cand1    | 0.009 | 0.057 | -0.021 | 0.028  | 0.000  | -0.389 | -0.813 | -0.557 |
| Q6PDI5 | Ecm29    | 0.133 | 0.297 | 0.000  | -0.153 | 0.001  | 0.008  | -1.570 | -1.600 |
| Q6PB66 | Lrpprc   | 0.035 | 0.125 | 0.000  | 0.121  | -0.292 | 0.941  | 0.428  | 0.430  |
| Q62351 | Tfrc     | 0.848 | 1.000 | 1.330  | 0.000  | -0.491 | 1.130  | -0.397 | -0.350 |
| Q62077 | Plcg1    | 0.003 | 0.033 | -0.125 | 0.000  | 0.471  | -1.190 | -1.370 | -1.750 |
| Q61823 | Pdcd4    | 0.011 | 0.065 | -0.098 | 0.000  | 0.177  | -1.090 | -2.030 | -1.100 |
| Q61081 | Cdc37    | 0.002 | 0.027 | 0.019  | 0.000  | -0.009 | -0.837 | -1.370 | -1.050 |
| Q60932 | Vdac1    | 0.006 | 0.046 | 0.000  | 0.313  | -0.052 | 1.240  | 1.010  | 1.700  |
| Q60931 | Vdac3    | 0.007 | 0.050 | 0.000  | 0.252  | -0.058 | 1.080  | 0.902  | 1.570  |
| Q60787 | Lcp2     | 0.009 | 0.057 | -0.096 | 0.845  | 0.000  | -1.390 | -1.550 | -1.040 |
| Q60631 | Grb2     | 0.005 | 0.041 | -0.091 | 0.403  | 0.000  | -1.080 | -1.510 | -0.944 |
| Q3UUV5 | Skap1    | 0.002 | 0.023 | -0.314 | 0.000  | 0.236  | -1.930 | -2.300 | -1.630 |
| Q3UPF5 | Zc3hav1  | 0.070 | 0.193 | -0.342 | 0.000  | 0.012  | -0.376 | -0.579 | -0.367 |
| Q3UNDO | Skap2    | 0.206 | 0.403 | 0.518  | 0.000  | -0.624 | -0.258 | -0.599 | -1.130 |
|        | Tmem17   |       |       |        |        |        |        |        |        |
| Q3TBT3 | 3        | 0.649 | 0.925 | -0.395 | 0.164  | 0.000  | -0.291 | -0.323 | 0.074  |
| Q1HFZ0 | Nsun2    | 0.102 | 0.247 | 0.289  | 0.000  | -0.086 | -0.029 | -1.110 | -0.849 |
| Q03526 | ltk      | 0.005 | 0.041 | 0.620  | -0.355 | 0.000  | -2.150 | -1.480 | -1.840 |
| Q01965 | Ly9      | 0.539 | 0.807 | 0.248  | -0.106 | 0.000  | -0.213 | -0.306 | 0.254  |
| P97370 | Atp1b3   | 0.009 | 0.056 | 0.000  | 0.096  | -0.048 | 0.414  | 0.419  | 0.703  |
| P70218 | Map4k1   | 0.001 | 0.015 | -0.001 | 0.000  | 0.020  | -0.901 | -1.290 | -1.110 |
| P70168 | Kpnb1    | 0.204 | 0.400 | -0.040 | 0.088  | 0.000  | -0.081 | -0.545 | -0.064 |
| P68254 | Ywhaq    | 0.006 | 0.046 | -0.139 | 0.000  | 0.050  | -0.858 | -1.630 | -1.230 |
| P63101 | Ywhaz    | 0.001 | 0.015 | 0.000  | -0.021 | 0.113  | -1.140 | -1.610 | -1.370 |
| P63037 | Dnaja1   | 0.340 | 0.580 | 0.072  | 0.000  | -0.107 | 0.131  | -0.492 | -0.294 |
| P62259 | Ywhae    | 0.027 | 0.105 | 0.000  | 0.068  | -0.183 | -0.420 | -1.160 | -0.884 |
| P61982 | Ywhag    | 0.016 | 0.078 | 0.076  | 0.000  | -0.065 | -0.399 | -0.977 | -0.678 |
| P61290 | Psme3    | 0.001 | 0.021 | 0.000  | 0.420  | -0.049 | -1.120 | -1.150 | -1.340 |
| P54775 | Psmc4    | 0.018 | 0.083 | -0.123 | 0.000  | 0.106  | -0.391 | -0.884 | -0.580 |
| P49718 | Mcm5     | 0.432 | 0.688 | 0.140  | 0.000  | -0.032 | 0.135  | -0.802 | -0.001 |
| P43404 | Zap70    | 0.038 | 0.131 | -0.465 | 0.041  | 0.000  | -0.669 | -0.946 | -0.589 |
| P42227 | Stat3    | 0.103 | 0.250 | 0.000  | -0.155 | 0.131  | -0.089 | -0.977 | -0.688 |

|        |         |       |       |        |        |        |        |        |        |
|--------|---------|-------|-------|--------|--------|--------|--------|--------|--------|
| P42225 | Stat1   | 0.005 | 0.039 | -0.079 | 0.271  | 0.000  | -0.603 | -0.992 | -0.866 |
| P39688 | Fyn     | 0.582 | 0.853 | -0.633 | 0.103  | 0.000  | -0.287 | -0.529 | -0.169 |
| P39054 | Dnm2    | 0.326 | 0.562 | 0.075  | -0.001 | 0.000  | 0.448  | -0.098 | 0.271  |
| P36371 | Tap2    | 0.787 | 1.000 | -0.225 | 0.273  | 0.000  | -0.153 | -0.078 | 0.133  |
| P27870 | Vav1    | 0.049 | 0.154 | 0.325  | 0.000  | -0.114 | -0.272 | -1.240 | -1.350 |
| P26450 | Pik3r1  | 0.468 | 0.727 | 0.000  | 0.958  | -0.100 | -0.021 | 0.030  | 0.038  |
| P26039 | Tln1    | 0.041 | 0.137 | 0.059  | 0.000  | -0.282 | -0.358 | -1.020 | -1.000 |
| P25206 | Mcm3    | 0.066 | 0.185 | 0.280  | 0.000  | -0.196 | -0.205 | -1.110 | -0.943 |
| P24161 | Cd247   | 0.811 | 1.000 | -0.617 | 0.000  | 0.247  | -0.627 | 0.147  | 0.420  |
| P24063 | Itgal   | 0.054 | 0.163 | -0.246 | 0.010  | 0.000  | -0.641 | -0.514 | -0.247 |
| P22682 | Cbl     | 0.000 | 0.013 | -0.024 | 0.000  | 0.154  | -1.190 | -1.550 | -1.380 |
| P22646 | Cd3e    | 0.501 | 0.766 | -0.349 | 0.000  | 0.371  | -0.475 | -0.277 | 0.156  |
| P19783 | Cox4i1  | 0.004 | 0.038 | 0.100  | -0.024 | 0.000  | 0.711  | 0.422  | 0.696  |
| P11942 | Cd3g    | 0.167 | 0.349 | -0.367 | 0.000  | 0.062  | -0.670 | -0.495 | -0.158 |
| P11352 | Gpx1    | 0.131 | 0.294 | 0.457  | 0.000  | -0.235 | -0.028 | -0.804 | -0.877 |
| P08113 | Hsp90b1 | 0.004 | 0.035 | 0.176  | 0.000  | -0.151 | 1.090  | 0.696  | 0.949  |
| P04235 | Cd3d    | 0.281 | 0.504 | -0.353 | 0.097  | 0.000  | -0.435 | -0.393 | -0.084 |
| P01851 | Tcb2    | 0.061 | 0.176 | -0.290 | 0.000  | 0.247  | -0.718 | -0.420 | -0.372 |
| O89100 | Grap2   | 0.049 | 0.154 | -0.257 | 0.110  | 0.000  | -0.559 | -2.360 | -1.760 |
| O54957 | Lat     | 0.507 | 0.771 | -0.255 | 0.567  | 0.000  | 0.081  | 0.134  | 0.862  |
| O54734 | Ddost   | 0.002 | 0.025 | 0.000  | 0.042  | -0.469 | 1.490  | 1.120  | 1.220  |

**Supp. Table 4.** Proteins related to TCR signalosome were detected in CD4<sup>+</sup> T cells isolated from old mice after mito-transfer and in non-manipulated CD4<sup>+</sup> T cells from old mice. CD4<sup>+</sup> T cells from young and old mice, and from old mice after mito-transfer were cultured for 4 h before processing for mass spectrometry analysis. Data expressed as median protein Log2 fold change of CD4<sup>+</sup> T cells from old mice, from 3 individual old mice (paired experiment)
